# 1 Progress towards lymphatic filariasis elimination in Ghana 2 from 2000-2016: analysis of microfilaria prevalence data 3 from 430 communities

4

5 Nana Kwadwo Biritwum,<sup>1,a\*</sup> Kwadwo K. Frempong,<sup>2,3,a\*</sup> Suzanne Verver,<sup>3</sup> Samuel Odoom,<sup>1</sup>  
6 Bright Alomatu,<sup>1</sup> Odame Asiedu,<sup>1</sup> Periklis Kontoroupis,<sup>3</sup> Abednego Yeboah,<sup>1</sup> Edward Tei  
7 Hervie,<sup>1</sup> Daniel A. Boakye,<sup>2,4</sup> Sake J. de Vlas,<sup>3</sup> John O. Gyapong,<sup>5,6</sup> Wilma A. Stolk<sup>3</sup>.

8

- 9 1. Neglected Tropical Disease Programme, Ghana Health Services (GHS), Accra, Ghana.
- 10 2. Department of Parasitology, Noguchi Memorial Institute for Medical Research  
11 (NMIMR), College of Health Sciences, University of Ghana, Legon, Ghana.
- 12 3. Erasmus MC, University Medical Center Rotterdam, Department of Public Health,  
13 Rotterdam, Netherlands.
- 14 4. African Programme for Onchocerciasis Control (APOC), Ouagadougou, Burkina Faso.
- 15 5. University of Ghana, Legon, Ghana.
- 16 6. University of Health and Allied Science, Ho, Ghana

17

18 \*Corresponding authors

19 <sup>a</sup>NKB and KKF contributed equally to this work

20

21 NKB: [nkadbiritwum@gmail.com](mailto:nkadbiritwum@gmail.com)

22 KKF: [kfrempong@noguchi.ug.edu.gh](mailto:kfrempong@noguchi.ug.edu.gh)

23 SV: [s.verver@erasmusmc.nl](mailto:s.verver@erasmusmc.nl)

24 SO: [samodoom2001@yahoo.com](mailto:samodoom2001@yahoo.com)

25 BA: [balomatu@yahoo.com](mailto:balomatu@yahoo.com)

26 OA: [odame\\_114@yahoo.com](mailto:odame_114@yahoo.com)

27 PK: [p.kontoroupis@erasmusmc.nl](mailto:p.kontoroupis@erasmusmc.nl)

28 AY: [abednegoyeboah@yahoo.co.uk](mailto:abednegoyeboah@yahoo.co.uk)

29 ETH: [teihervie@yahoo.com](mailto:teihervie@yahoo.com)

30 DAB: [dboakye@noguchi.ug.edu.gh](mailto:dboakye@noguchi.ug.edu.gh)

31 SJdV: [s.devlas@erasmusmc.nl](mailto:s.devlas@erasmusmc.nl)

32 JOG: [jgyapong@ug.edu.gh](mailto:jgyapong@ug.edu.gh)

33 WAS: [w.stolk@erasmusmc.nl](mailto:w.stolk@erasmusmc.nl)

34

35 **Key words:** lymphatic filariasis, mass drug administration, microfilaria prevalence, elimination,  
36 ivermectin, albendazole

37

38

39 **Journal submitting to:** PLOS NTD

40 **Word count of the full paper:**

## 41 **Abstract**

### 42 **Background**

43 Ghana started its national programme to eliminate lymphatic filariasis (LF) in 2000, with mass  
44 drug administration (MDA) with ivermectin and albendazole as main strategy. We review the  
45 progress towards elimination that was made by 2016 for all endemic districts of Ghana and analyze  
46 mf prevalence from sentinel and spot-check sites in endemic districts.

47

### 48 **Methods**

49 We reviewed district level data on the history of MDA and outcomes of transmission assessment  
50 surveys (TAS). We further collated and analyzed microfilaria (mf) prevalence data from sentinel  
51 and spot-check sites.

52

### 53 **Results**

54 MDA was initiated in 2001-2006 in all 98 endemic districts; by the end of 2016, 81 had stopped  
55 MDA after passing TAS and after an average of 11 rounds of treatment (range 8 – 14 rounds). The  
56 median reported coverage for the communities was 77-80%. Mf prevalence survey data were  
57 available for 430 communities from 78/98 endemic districts. Baseline mf prevalence data were  
58 available for 53 communities, with an average mf prevalence of 8.7% (0 - 45.7%). Repeated  
59 measurements were available for 78 communities, showing a steep decrease in mean mf  
60 prevalence in the first few years of MDA, followed by a gradual further decline. In the 2013 and  
61 2014 surveys, 7 and 10 communities respectively were identified with mf prevalence still above  
62 1% (maximum 5.6%). Two stopped MDA in 2015 and 2016 respectively, while the rest of the 15  
63 communities above threshold are all within 13/17 districts where MDA is still ongoing.

64

65 **Conclusions**

66 The MDA programme of the Ghana Health Services has reduced mf prevalence in sentinel sites  
67 below the 1% threshold in 81/98 endemic districts in Ghana, yet 15 communities within 13 districts  
68 (MDA ongoing) had higher prevalence than this threshold during the surveys in 2013 and 2014.  
69 These districts may need to intensify interventions to achieve the WHO 2020 target.

70

71

## 72 **Author summary**

73 Lymphatic filariasis (LF) control in Ghana has relied on ivermectin and albendazole since the year  
74 2000 when the Ghana Filariasis Elimination Programme started. We analyzed trends in  
75 microfilaraemia prevalence during MDA, reported coverage, and transmission assessment survey  
76 using data obtained from the Ghana Health Services (GHS). The median reported treatment  
77 coverage varied between 77-80% over the years. Our results show that the treatment in Ghana  
78 made a significant impact in reducing infections <1% in majority of sentinel sites in endemic  
79 districts (81/98) by 2016. In the remaining 17 districts, extra efforts may be needed to achieve the  
80 same goal. Some of the challenges could be low coverage in some communities, high baseline  
81 endemicity, programme logistical challenges etc. The required average rounds of MDA needed for  
82 elimination was 11, higher than that proposed by the Global Filariasis Elimination Programme.  
83 This article is relevant to LF control programmes in assessing the impact of MDA. It is important  
84 for programmes to monitor infections especially within communities where mf prevalence is still  
85 above the 1% threshold to ensure that the WHO 2020 elimination target is achieved.

86

## 87 **Introduction**

88 Lymphatic filariasis (LF), commonly known as elephantiasis, is a debilitating and disfiguring  
89 tropical disease caused by lymphatic-dwelling filarial parasites *Wuchereria bancrofti*, *Brugia*  
90 *malayi* and *Brugia timori*. The disease is transmitted by different species of mosquitoes depending  
91 on the geographical location, including *Culex*, *Anopheles* and *Aedes* species. About 90% of the  
92 worldwide cases are caused by *W. bancrofti* and 10% caused by *B. malayi* and *B. timori*. Based on  
93 re-assessment of the global prevalence and distribution of LF [1], more than 120 million people  
94 were found to be infected and 40 million disfigured and incapacitated in the year 2000 [2]. In the  
95 same year, the Global Programme to Eliminate Lymphatic Filariasis (GPELF) was established,  
96 aiming to eliminate the disease as a public health problem by 2020 through annual mass drug  
97 administration (MDA) with albendazole in combination with diethylcarbamazine citrate (DEC) or  
98 ivermectin to all individuals at risk [3].

99  
100 By the end of 2016, 20 out of 73 countries originally listed by WHO as being endemic for LF have  
101 stopped interventions after passing the first transmission assessment survey and are conducting  
102 surveillance to validate elimination. Additional 30 countries have delivered MDA at least once in  
103 all endemic areas and are also on track to achieve elimination [4]. While many have passed the  
104 TAS, there are also reports of failure [5] and of ongoing transmission in spite of passing the TAS  
105 [5-7].

106  
107 A national survey carried out in Ghana in 1994 showed that the microfilaraemia prevalence varied  
108 from 0 - 20% between regions [8]. In the highly-endemic Kassena Nankana district (Upper East  
109 Region of Ghana), the prevalence of hydrocele was 30.8% and elephantiasis of the leg was 3.8%

110 in the population aged 10 years and above [9,10]; 12% of extended families reported to have at  
111 least one family member with elephantiasis of the leg [10]. The extensive mapping of endemic  
112 communities [11] provided a database on areas in Ghana and neighboring countries that needed  
113 more efforts to eliminate the disease.

114

115 The LF elimination programme in Ghana started in 2000 and gradually scaled up over the years  
116 and by 2006 all endemic districts were covered. The implementation and outcomes by district were  
117 described in two recent papers [12,13]. By 2016, 81 of 98 initially endemic districts had reached  
118 an mf prevalence <1%, had passed TAS survey and stopped MDA, while the remaining districts  
119 still had mf prevalence >1% [13] in spite of at least 10 years of MDA. The required duration of  
120 MDA turned out to be longer than the anticipated 5-6 years, which might be due to relatively high  
121 baseline mf prevalence levels. There were no major differences with other districts in reported  
122 coverage of MDA or long-lasting insecticide treated bednets [13].

123

124 Expected trends in infection during MDA will depend on multiple factors, including local baseline  
125 endemicity (depending on local transmission conditions) and the achieved coverage and  
126 compliance with MDA. To obtain better understanding of these factors, in this paper we present  
127 and analyze community-level data from microfilaraemia prevalence surveys and transmission  
128 assessment surveys (TAS) from sentinel and spot-check sites for all endemic districts in Ghana.  
129 So far, this study represents the longest and largest LF programmatic study in Africa.

## 130 **Methods**

### 131 **Ghana Filariasis Elimination Programme**

132 The Ghana Filariasis Elimination Programme (GFEP) was established in June 2000 following the  
133 establishment of the Global Programme to Eliminate Lymphatic Filariasis. Mapping of  
134 communities started in 2000 using the 50-km sample grid, rapid assessment procedure for  
135 antigenaemia in sample villages and spatial analysis to plot prevalence contours from 2000 to 2001  
136 [11,14]. Forty nine districts were initially identified as endemic and therefore selected for  
137 implementation of MDA. The GFEP implementation, programme outcomes, challenges and  
138 districts re-demarcation have been described in Biritwum *et al.* (2017a). Based on current  
139 demarcation, 98/216 districts (45%) are endemic with LF in Ghana.

140

141 The treatment implemented in Ghana was the combination of ivermectin (150 µg/kg) and  
142 albendazole (400 mg) given annually by the community-directed treatment approach [15] and  
143 implemented at the district level. MDA usually took place between March and June in all endemic  
144 communities across the country. Individuals eligible for treatment were those aged  $\geq 5$  years  
145 (excluding pregnant women, lactating mothers and the sick), and selection was solely based on  
146 height ( $\geq 90$  cm) for those whose ages were not known. MDAs usually lasted for about 1 - 2 weeks  
147 per community. Individual treatment information (whether treated, absent, pregnant, sick, etc) was  
148 recorded in the community treatment book and summarized into treatment records by the Ghana  
149 Health Services (GHS). Community-level treatment coverage data (number treated out of total  
150 population at risk) across the country were reviewed and summarized by the GHS. For the purpose  
151 of this study, summary reports were reviewed.

152

153 There was no treatment offered in 2011 due to logistic and funding challenges; 2009 and 2012  
154 treatment data were not available.

155

## 156 **Monitoring and evaluation**

### 157 *Parasitological surveys*

158 Parasitology data were collected by the GHS in programmatic yearly surveys (2000 - 2014) in  
159 selected endemic communities. In 2000, baseline mf surveys were carried out in 24 purposefully  
160 selected endemic communities (based on known high endemicity and population stability) [16,17]  
161 from the 8 districts where MDA was first initiated . From 2001-2004, baseline mf surveys were  
162 done in sentinel sites of remaining districts, as MDA was being extended into these districts.  
163 Subsequently, the previously selected sentinel sites per district were repeatedly surveyed to  
164 monitor progress to elimination (usually once every 2 or 3 years, but sometimes the interval was  
165 much longer due to financial constrains). Additional surveys were done in spot-check sites (same  
166 characteristics as sentinel) that were surveyed only once and often selected randomly from the  
167 same district where sentinel site is located to cross check the MDA performance in that district.

168

169 The mf surveys were usually done at the end of the year between November and December (before  
170 MDA treatment was done the following year between March-July). The target number of persons  
171 for sampling increased over time based on WHO guidelines; between 2000 - 2002 the target was  
172 100 persons per community, between 2003 - 2009 it was 500 persons, and after 2009 it was 1000  
173 - 1500 persons. The surveys were usually preceded by a community gathering or announcement  
174 by the team informing members of the community to converge for the night blood collection (9pm  
175 - 2am). Those selected for sampling were verbally consenting individuals (parent consented for



176 their children) aged  $\geq 5$  years or with height  $\geq 90$  cm height for those whose ages were not known,  
177 including pregnant women and lactating mothers. Blood was sampled from these individuals by  
178 finger pricking (middle or forth finger) and a volume of 60  $\mu$ l taken for thick blood smear test (2000  
179 - 2009) [18]. In later years (2010 - 2014), the volume of blood sampled was increased to 100  $\mu$ l  
180 and the microfilariae were counted using a regular microscope with a rafter counting chamber [19],  
181 by trained GHS laboratory technicians.

182

### 183 *Transmission assessment surveys*

184 The transmission assessment surveys (TAS) in Ghana followed the WHO guidelines, using  
185 antigenaemia prevalence in children aged 6 - 7 years as indicator of active transmission of LF [20].  
186 TAS has a different sampling system and a different target population than a full mf survey. In  
187 Ghana, the elimination programme used a district as an implementation unit (IU) for MDA. The  
188 evaluation unit (EU) to assess progress of programme may also be a district or a cluster of districts  
189 with a population not more than 2 million. In some of the cities where the district population was  
190 more than 2 million, the district was divided into different EUs. An EU qualified to be assessed  
191 after achieving treatment coverage of  $\geq 65\%$  for 5 years and also recording mf prevalence of  $< 1\%$ .  
192 Those EUs who met the criteria were selected for the TAS. The TAS involved sampling of children  
193 6 - 7 years in primary schools within the EU after written consent from their parents. The schools  
194 to be surveyed, the number of children to be tested and the critical cut-off point (maximum number  
195 of positives to fail TAS) were estimated using a survey sample builder software recommended by  
196 WHO [21]. A volume of 100  $\mu$ l blood was taken from the children by finger pricking and test done  
197 using immunochromatographic card test (ICT) [22]. The EUs where the number of positive  
198 children was less than the critical cut-off point, passed the TAS (TAS-1) and the MDA was stopped

199 after the last treatment. The MDA stop decision is based on TAS-1. After stopping MDA, two  
200 more TAS surveys (TAS-2 & TAS-3) are done after 2 - 3 years and 5 years respectively before  
201 elimination said to be achieved. During TAS-1, the EU with number of positive children above  
202 the critical cut-off point, failed the TAS and continued MDA for 2 - 3 years. In such EUs, a  
203 community survey was required to achieve an mf prevalence of <1% before TAS-1 was repeated  
204 [13].

205

## 206 **Data collation and analysis**

207 The longitudinal parasitological and treatment data from 2000 - 2014 were collated along with  
208 background information from the GHS and updates on TAS results till early 2016. Parasitological  
209 data comprised of number examined and number that were microfilarial positive in each  
210 community. Community mf prevalence was estimated as the number of microfilarial positives as  
211 a percentage of number examined. Mean mf prevalence (for districts and country) were calculated  
212 by estimating the percentage of total positive / total examined and total treated / total population  
213 of communities included in the sample respectively. We present data on community, district and  
214 country level.

215

### 216 *Data limitations and special situations*

217 We only consider mf prevalence data in our analysis of community-level trends in infection  
218 prevalence. No mf prevalence data were available for 2001 and data for 2002 were limited to few  
219 sites, as all community surveys in 2001 and part of the survey in 2002 only used ICT antigenaemia  
220 tests. For 3 districts in 2003 (with 2 communities surveyed per district) and all districts in 2005  
221 (with 3-4 communities surveyed per district) mf prevalence was not reported for each community

222 separately, and we only know the overall mf prevalence - aggregated over the surveyed  
223 communities. These aggregated data points were included in combined trends (averages) for all  
224 communities, but were not matched to community specific data for analysis for time trend analysis.  
225 There were no mf surveys carried out in 2006. Mf prevalence data in 2008 and 2010 were excluded  
226 from trends and analysis since communities sampled in these years were not randomly selected  
227 (mf data from individuals closely related to school children who were positive using ICT during  
228 school surveys).

229

### 230 **Ethics Statement**

231 Ethical clearance was obtained from the Ghana Health Service Ethical Review Committee (ID  
232 NO: GHS-ERC-10/0/06) and the Liverpool School of Tropical Medicine's Research Ethics  
233 Committee's Research Protocol Approval (06.47). The study obtained oral informed consent from  
234 adult participants while parents and guardians orally consented for their children and wards to be  
235 part of this study. Due to the programmatic nature of the study with regular MDA and mf surveys  
236 done in many sites, participants in these communities were aware of the program. Given that the  
237 communities were mainly rural with study participants having minimal or no education and being  
238 suspicious of signing documents they did not well understand, oral consent was applied and noted  
239 as part of questionnaires during the surveys. Oral informed consent was approved by the Ghana  
240 Health Service and Liverpool School of Tropical Medicine's ethical review committees.

241

## 242 Results

### 243 Overview of MDA implementation in Ghana

244 MDA started between 2000 and 2001 in 10/98 districts selected from the northern and coastal  
245 regions of Ghana. In 2002, 17 more districts were enrolled onto the MDA programme and in 2003,  
246 2004 and 2005 a number of 27, 16 and 25 more districts were enrolled onto the MDA programme  
247 respectively. By 2006 all the 98 endemic districts had been enrolled (Figures 1 and 2, Table 1).  
248 All communities in each district were expected to be treated in the same year MDA started, thus  
249 geographical coverage within a district was expected to be 100%.

250

#### 251 *Reported coverage of MDA by calendar year in Ghana*

252 The median reported treatment coverage in treated districts of Ghana seemed to be constant over  
253 time, around 77 - 80% between 2000 – 2010, and the interquartile range and distribution of outliers  
254 are also similar over time (Figure S2). Although mean reported coverage per year seem to be high,  
255 there are large differences between communities. Community-level coverage estimates varied  
256 from 10 to 120%, with at least 7952/41265 (19.3%) surveys having a coverage under 65% and  
257 198/41265 (0.5%) surveys over 100%, indicating wrong denominators.

258

259

260 **Fig 1: Implementation of district-level MDA in Ghana.** A) Period of MDA by each district in order  
261 of start year. Each horizontal line represents a district. Bars with a dashed section on the right-hand side represent  
262 districts where MDA is still ongoing after 2016 with unknown end year. See supplementary Table S2 for more  
263 details. B) Frequency distribution of the number of treatments provided by district through 2016, presented  
264 separately for districts that had stopped MDA by 2016 and those with still ongoing MDA.

265

266 TAS was done in 5 districts in 2010, and all passed. Another 65, 9 and 2 districts had their first  
267 TAS in 2014, 2015 and early 2016, respectively and all passed. By the end of 2016, 81 out of the  
268 98 endemic districts had passed the TAS in Ghana and had stopped MDA (Figures 1 and 2). 17

269 are left, of whom 4, 3, 8, 1 and 1 district have done 11, 12, 14, 15 and 16 rounds of MDA,  
270 respectively (see Table S2, supplementary data for details). The average number of treatment  
271 rounds in districts that stopped MDA was 11 rounds, varying from 8 – 14. In 6 communities that  
272 were re-surveyed in 2014 for mf prevalence after stopping MDA in 2010, mf prevalence was  
273 always below <1%. TAS-2 was performed in 69 districts in 2012 or 2015, and all districts passed.  
274 Details of the TAS surveillance in Ghana are given in Table S2, supplementary data.

275

276

277 **Fig 2: Progress of MDA implementation in Ghana.** NB: In the year 2011, there was no treatment due  
278 to some logistical challenges. The maps give an overview of the treatment progression to cover all the endemic  
279 districts in Ghana.

280

281

## 282 **Trends in Mf prevalence**

283 Mf prevalence data were available from 613 community mf surveys (datapoints), carried out  
284 between 2000 to 2014 in 430 communities (292 sentinel sites; 138 spot-check sites) in 78 out of  
285 the 98 endemic districts (within 8/10 regions of Ghana). Twenty districts were not represented in  
286 our compiled database, either because only antigenaemia data or TAS data were available or  
287 because no surveys had been done after re-demarcation of districts. 352 communities were  
288 measured only once and 78 measured multiple times (sampled between 2-6 times). Out of those  
289 measured multiple times, 35 communities also had data including baseline. Most of the single time  
290 point surveys were observed after 2007 (Figure 3A). Overall, the total number of individuals  
291 sampled per year ranged between 1,784 – 19,268 (Table 1).

292

## 293 *Baseline mf prevalence*

294 Baseline parasitological surveys were carried out in the years 2000 - 2004, before the start of  
295 MDA, examining 7,882 individuals from 53/430 communities within 21/98 districts. The number

296 of individuals examined per community at baseline ranged between 52 - 441 (mean 137, median  
297 112). The average mf prevalence at baseline was 8.7% (range 0-45.7%) with the highest recorded  
298 in Gyahadze located in the central region of Ghana (See supplementary Table S1).

299 *Trends in mf prevalence over time (2000-2014)*

300 Community-level mf prevalence data are presented by calendar year (Figure 3A). The impact of  
301 MDA on mf prevalence cannot clearly be seen from this figure, due to the differences between  
302 communities in start year of MDA. In Figure 3B, therefore, the same data are presented by time  
303 since first treatment, while Figure 3C presents these data in boxplots to better visualize the  
304 distribution of the observed community-level mf prevalence. From these data, we conclude that  
305 the variation in baseline prevalence was huge. The mean and median mf prevalence in surveyed  
306 communities declined strongly with increasing duration of MDA. The small increase in median  
307 prevalence observed 1 year after the onset of sampling is a selection effect and does not indicate a  
308 lack of impact, because surveys were only done in districts with a relatively high baseline mf  
309 prevalence. Although 6-7 years after the onset of MDA the median prevalence had fallen below  
310 1%, there was still huge variation between communities and many communities still had mf  
311 prevalence levels above 5%. The number of districts and communities surveyed declines over time,  
312 because districts that have stopped MDA are no longer included in surveys. In addition, surveys  
313 were selectively performed in communities in districts with low reported coverage or relatively  
314 high prevalence in previous surveys. For these reasons, trends in mean and median mf prevalence  
315 of surveyed villages during later stages of the control are difficult to interpret. Yet, we still see a  
316 continued decline in the maximum observed prevalence levels with increasing duration of MDA.  
317 In most communities with multiple measurement the mf prevalence steadily decreased over time,  
318 but 12 out of 78 (15%) communities had at least once an increase between 2 time points (Figure

319 3A & B). In the 2013 and 2014 surveys, 7 and 10 communities respectively were identified with  
320 mf prevalence still above 1% (maximum 5.6%). Only 2 stopped MDA in 2015 and 2016  
321 respectively. The rest of the 15 communities above threshold are all within 13 out of the 17 districts  
322 where MDA is still ongoing.

323  
324 In 34 districts, one or more communities were surveyed at least twice during the period of MDA.  
325 Data for these districts are shown in supplementary file Figure S1. When community data were  
326 aggregated at district level, there was a general decrease in average mf prevalence over time to  
327 approach zero in most districts (Figure S1, red line). In 4 districts (Bongo, Jirapa, Lambussie-K  
328 and Lawra) there were slight increases in mf prevalence after baseline before decreasing steadily.  
329 Almost all the districts we assessed, apart from two (Lawra and Wa-West), showed mf prevalence  
330 less than 5% after 6 years of MDA (Figure S1, supplementary data). In 31 out of these 34 districts  
331 (91%), mf prevalence eventually fell below <1% after 6 - 14 rounds of treatment; this was not the  
332 case in three districts (Bole, Jirapa and Wa-West) where the mf prevalence was still  $\geq 1\%$  in 2013  
333 or 2014 and MDA is still ongoing. 51 out of the 78 examined districts/IUs (65%) needed more  
334 than 6 rounds of MDA to reach mf prevalence of <1%.

335  
336  
337 **Fig 3: Observed lymphatic filariasis mf prevalence in sentinel and spot-check sites in Ghana,**  
338 **measured in the population aged 5 and above, for the period 2000-2014.** A) Data presented by  
339 calendar year. Multiple observations from the same community are connected through thin grey lines. Observations  
340 from communities surveyed only once are highlighted in red. Observations presenting aggregated prevalence over  
341 multiple communities are displayed in blue (in 2003 and 2005). Dashed lines represent the average prevalence from  
342 all surveyed communities at each time point. Bullets at the same time point have been jittered to avoid overlapping of  
343 points at the same position; these do not represent time in months. B) As panel A but with time since first treatment  
344 on the horizontal axis. C) As B, but with data summarized in boxplots. The box at each time post treatment represents  
345 the interquartile range of mf prevalence in  $\geq 5$  years and the thick horizontal lines across each box represent the median  
346 mf prevalence. The bullets outside each box (above or below) represent the outliers and are defined as 1.5 times the  
347 interquartile range above or below the ends of the box (25<sup>th</sup> and 75<sup>th</sup> percentile). The vertical lines (whiskers) extend  
348 to the first value (mf prevalence) before the outlier cut-off and where there are no outliers, they represent the minimum  
349 and maximum mf prevalence at each time post treatment. The numbers in the boxes are the total number of  
350 communities examined at each time post treatment.

351  
352  
353  
354



## 355 **Discussion**

356 Ghana has made good progress towards elimination since the start of its elimination programme  
357 in 2000. The baseline mf prevalence in sentinel sites was 8.7% on average, ranging from 0 to  
358 45.7%. The mf prevalence declined steeply during the first few years after starting MDA in  
359 communities, followed by a more gradual decline thereafter (Figure 3A). Surveys performed after  
360 6-7 rounds of MDA showed high variation between communities in mf prevalence, with the mf  
361 prevalence often exceeding 1% or even 5% (Figure 3B & C). By the end of 2016, 81 out of 98  
362 endemic districts had stopped mass drug administration (MDA) after an average of 11 rounds of  
363 treatment (range 8 – 14). Currently, treatment is still ongoing in 17 districts in Ghana.

364  
365 We have created a unique longitudinal database on the long-term impact of MDA for lymphatic  
366 filariasis (LF) elimination in Ghana, containing data from 430 sentinel and spot-check sites. There  
367 are at least 12 countries that have reported longitudinal trend data on at least 3 microfilaria (mf)  
368 prevalence surveys of LF after at least 3 rounds of MDA, of whom 5 in Africa: Tanzania, Kenya,  
369 Nigeria, Egypt and Mali [23-28]. These African studies have reported the impact of 4 - 10 rounds  
370 of MDA on antigenaemia/mf prevalence within 4 - 20 sentinel/study sites where about 50 - 2000  
371 participants were tested per year. Since we have more data (15 years MDA, 430 communities,  
372 1,784 - 19,268 participants), this gives us more insight into the impact of MDA on mf prevalence,  
373 the dynamics involved over a period of time and the variability in outcomes between sites.

374  
375 At country-level we observed huge variation in baseline endemicity level and trends towards  
376 elimination (Figure 3 A&B). Patterns became clearer with less variation within districts when we  
377 plotted and analyzed data by districts (Figure S1). For some districts only few observations were

378 available, especially in districts with relatively low baseline prevalence, where elimination was  
379 relatively rapidly achieved, obviating the need for further surveys. In districts with relatively high  
380 baseline mf prevalence, sometimes many rounds of MDA were needed to ensure that mf  
381 prevalence reach below 1%.

382  
383 When GPELF was initiated, it was expected that elimination could be reached after 5 or 6 rounds  
384 of MDA with good coverage –  $\geq 65\%$  [3,29]. Although few countries were indeed able to reach  
385 elimination within the 5 - 6 years of MDA [2], the required treatment duration in Ghana was always  
386 longer, often considerably longer. This experience can help other African countries with planning  
387 their interventions. Previous modelling studies already suggested that 5-6 rounds of MDA would  
388 not be enough in case of low coverage and/or high baseline endemicity [7,30-32], and the same  
389 factors may explain why the required treatment duration in some Ghanaian districts is much longer  
390 than in others [13].

391  
392 Our data confirm the importance of baseline endemicity for the required treatment duration, but  
393 the role of coverage was more difficult to proof. Reported coverage data at community level were  
394 collated for all endemic district of Ghana (see supplementary data; Figure S2 for details). Although  
395 the reported coverage was good for the majority of communities, coverage levels  $< 50\%$  are also  
396 frequently encountered. However, such data are notoriously unreliable, as also becomes clear from  
397 the frequent occurrence of reported coverage levels  $> 100\%$  and hence difficult to interpret [33].  
398 Low coverage is problematic, particularly if it is sustained over multiple treatment rounds. We  
399 could not assess the importance of this phenomenon in our data, as it appeared difficult to match

400 coverage data from subsequent years at community level and to match them to the mf prevalence  
401 data.

402

403 The high variation in mf prevalence after a given number of treatment rounds within districts, as  
404 observed in Ghana (this study) and elsewhere [5-7] complicates decision making. If communities  
405 with high residual mf prevalence are by chance not included in surveys, MDA may be stopped  
406 prematurely with danger of resurgence [5]. This could be prevented by targeting pre-TAS surveys  
407 to communities at high risk of residual transmission. High risk may occur due to programmatic or  
408 demographic factors [12], including migration during treatment period, treatment fatigue, high  
409 numbers of middle aged women (child bearing age; majority not taking drug due to pregnancy)  
410 etc. Other local factors contributing to transmission may be high biting rate of the mosquitoes and  
411 behavior of residents that influence exposure to mosquito bites [32,34]. Moreover, TAS is  
412 designed to cover a larger geographical area, with the hope that pockets with residual transmission  
413 would be identified in TAS surveys. However, it is unclear whether TAS is sufficiently sensitive  
414 to pick up such pockets since not all communities within the evaluation unit (district) are sampled,  
415 furthermore, some have reported transmission ongoing in spite of passing TAS [5,6]. Thus, the  
416 validity of TAS for longer-term post-MDA surveillance requires further investigation [35].

417  
418 We could not assess this in the current study, as most districts are usually not resurveyed shortly  
419 after stopping MDA. We have data for only 6 communities surveyed after stopping MDA, and all  
420 showed mf prevalence <1%.

421 Our data had some limitations. Firstly, we only considered mf data, as antigenaemia prevalence  
422 data were not always collected. Survey sites (apart from spot-check sites) were not randomly

423 chosen, but rather based on previous results and location, and most mf sites have been surveyed  
424 only once. The low number of persons sampled combined with less sensitive mf tests in early years  
425 makes the mf prevalence observed in early years less reliable (wide 95% CI, data for baseline  
426 shown in supplementary data, Table S1). Also, the selection of participants for night blood  
427 collection in each community was also not random since some households were more likely to  
428 attend than others. This is particularly problematic if those not participating in surveys are also  
429 more likely not to participate in MDA, resulting in biased and possibly flattered mf prevalence  
430 estimates.

431

## 432 **Conclusions and recommendations**

433 The Ghana Filariasis Elimination programme has had large impact, reducing mf prevalence <1%  
434 in 81/98 endemic districts. The remaining 17 districts still need MDA but also seem to be  
435 approaching elimination. There was variation in the required treatment rounds between and within  
436 districts. Stopping MDA must be done with caution, taking into account the risk that communities  
437 with residual transmission remain which could present a source for the resurgence of infection  
438 after stopping MDA. Monitoring at the community level is required to be maintained to sustain  
439 the gains that have already been made towards elimination of LF in Ghana.

440

441 **Acknowledgements**

442 We acknowledge the support from the chiefs, opinion leaders and the community drug distributors  
443 in the various communities for mobilizing participants during treatment and mf surveys. We also  
444 acknowledge the contributions from the NTD Programme team of the Ghana Health Services  
445 (GHS) for planning, implementing and coordinating all field activities and collation of data made  
446 available for this article.

447

448

## 449 References

450

- 451 1. Michael E, Bundy DA, Grenfell BT (1996) Re-assessing the global prevalence and distribution of  
452 lymphatic filariasis. *Parasitology* 112 ( Pt 4): 409-428.
- 453 2. WHO (2015) Global programme to eliminate lymphatic filariasis: progress report, 2014. *Wkly*  
454 *Epidemiol Rec* 90: 489-504.
- 455 3. Ottesen EA (2000) The global programme to eliminate lymphatic filariasis. *Trop Med Int Health* 5: 591-  
456 594.
- 457 4. WHO (2017) Summary of global update on preventive chemotherapy implementation in 2016:  
458 crossing the billion. *Weekly epidemiological records* 40: 589-608.
- 459 5. Rebollo MP, Mohammed KA, Thomas B, Ame S, Ali SM, et al. (2015) Cessation of mass drug  
460 administration for lymphatic filariasis in Zanzibar in 2006: was transmission interrupted? *PLoS*  
461 *Negl Trop Dis* 9: e0003669.
- 462 6. Rao RU, Samarasekera SD, Nagodavithana KC, Punchihewa MW, Dassanayaka TD, et al. (2016)  
463 Programmatic Use of Molecular Xenomonitoring at the Level of Evaluation Units to Assess  
464 Persistence of Lymphatic Filariasis in Sri Lanka. *PLoS Negl Trop Dis* 10: e0004722.
- 465 7. Subramanian S, Perumal V, Adinarayanan S, Kaliannagounder K, Rengachari R, et al. (2012)  
466 Epidemiological assessment of eight rounds of mass drug administration for lymphatic filariasis  
467 in India: implications for monitoring and evaluation. *PLoS Negl Trop Dis* 6: e1926.
- 468 8. Gyapong JO, Adjei S, Sackey SO (1996) Descriptive epidemiology of lymphatic filariasis in Ghana. *Trans*  
469 *R Soc Trop Med Hyg* 90: 26-30.
- 470 9. Gyapong JO, Badu JK, Adjei S, Binka F (1993) Bancroftian filariasis in the Kassena Nankana District of  
471 the upper east region of Ghana: a preliminary study. *J Trop Med Hyg* 96: 317-322.
- 472 10. Gyapong JO, Dollimore N, Binka FN, Ross DA (1995) Lay reporting of elephantiasis of the leg in  
473 northern Ghana. *Trans R Soc Trop Med Hyg* 89: 616-618.
- 474 11. Gyapong JO, Kyelem D, Kleinschmidt I, Agbo K, Ahouandogbo F, et al. (2002) The use of spatial  
475 analysis in mapping the distribution of bancroftian filariasis in four West African countries. *Ann*  
476 *Trop Med Parasitol* 96: 695-705.
- 477 12. Biritwum NK, de Souza DK, Marfo B, Odoom S, Alomatu B, et al. (2017a) Fifteen years of programme  
478 implementation for the elimination of Lymphatic Filariasis in Ghana: Impact of MDA on  
479 immunoparasitological indicators. *PLoS Negl Trop Dis* 11: e0005280.
- 480 13. Biritwum N-K, Yikpotey P, Marfo BK, Odoom S, Mensah EO, et al. (2017b) Persistent 'hotspots' of  
481 lymphatic filariasis microfilaraemia despite 14 years of mass drug administration in Ghana. *Trans*  
482 *R Soc Trop Med Hyg* 110: 690-695.
- 483 14. Gyapong JO, Remme JH (2001) The use of grid sampling methodology for rapid assessment of the  
484 distribution of bancroftian filariasis. *Trans R Soc Trop Med Hyg* 95: 681-686.
- 485 15. Gyapong M, Gyapong JO, Owusu-Banahene G (2001) Community-directed treatment: the way  
486 forward to eliminating lymphatic filariasis as a public-health problem in Ghana. *Ann Trop Med*  
487 *Parasitol* 95: 77-86.
- 488 16. WHO (2000) Preparing and implementing a national plan to eliminate lymphatic filariasis (in  
489 countries where onchocerciasis is co-endemic). WHO/CDS/CPE/CEE/200016: 25-27.
- 490 17. WHO (2005) Monitoring and epidemiological assessment of the programme to eliminate lymphatic fi  
491 lariasis at implementation unit level. WHO/CDS/CPE/CEE/200550.
- 492 18. WHO (1997) Bench Aids for the diagnosis of filarial infections. Available at:  
493 [http://appswhoint/iris/bitstream/10665/37156/1/9241544899\\_engpdf](http://appswhoint/iris/bitstream/10665/37156/1/9241544899_engpdf); Accessed on 21  
494 June,2016.

- 495 19. McMahon JE, Marshall TF, Vaughan JP, Abaru DE (1979) Bancroftian filariasis: a comparison of  
496 microfilariae counting techniques using counting chamber, standard slide and membrane  
497 (nuclepore) filtration. *Ann Trop Med Parasitol* 73: 457-464.
- 498 20. WHO (2012b) Transmission assessment surveys in the Global Programme to Eliminate Lymphatic  
499 filariasis.  
500 [http://apps.who.int/iris/bitstream/10665/77690/1/WHO\\_HTM\\_NTD\\_PCT\\_2012\\_9\\_eng.pdf](http://apps.who.int/iris/bitstream/10665/77690/1/WHO_HTM_NTD_PCT_2012_9_eng.pdf);  
501 Accessed on 13th May 2016.
- 502 21. WHO (2011) Monitoring and epidemiological assessment of mass drug administration in the GPELF;  
503 a manual for national elimination programmes. Available at:  
504 [http://apps.who.int/iris/bitstream/10665/44580/1/9789241501484\\_eng.pdf](http://apps.who.int/iris/bitstream/10665/44580/1/9789241501484_eng.pdf); Accessed on 21 June,  
505 2016.
- 506 22. Weil GJ, Lammie PJ, Weiss N (1997) The ICT Filariasis Test: A rapid-format antigen test for diagnosis  
507 of bancroftian filariasis. *Parasitol Today* 13: 401-404.
- 508 23. Mohammed KA, Molyneux DH, Albonico M, Rio F (2006) Progress towards eliminating lymphatic  
509 filariasis in Zanzibar: a model programme. *Trends Parasitol* 22: 340-344.
- 510 24. Coulibaly YI, Dembele B, Diallo AA, Konate S, Dolo H, et al. (2015) The Impact of Six Annual Rounds of  
511 Mass Drug Administration on *Wuchereria bancrofti* Infections in Humans and in Mosquitoes in  
512 Mali. *Am J Trop Med Hyg* 93: 356-360.
- 513 25. Njenga SM, Mwandawiro CS, Wamae CN, Mukoko DA, Omar AA, et al. (2011) Sustained reduction in  
514 prevalence of lymphatic filariasis infection in spite of missed rounds of mass drug administration  
515 in an area under mosquito nets for malaria control. *Parasit Vectors* 4: 90.
- 516 26. Ramzy RM, El Setouhy M, Helmy H, Ahmed ES, Abd Elaziz KM, et al. (2006) Effect of yearly mass drug  
517 administration with diethylcarbamazine and albendazole on bancroftian filariasis in Egypt: a  
518 comprehensive assessment. *Lancet* 367: 992-999.
- 519 27. Richards FO, Eigege A, Miri ES, Kal A, Umaru J, et al. (2011) Epidemiological and entomological  
520 evaluations after six years or more of mass drug administration for lymphatic filariasis  
521 elimination in Nigeria. *PLoS Negl Trop Dis* 5: e1346.
- 522 28. Simonsen PE, Derua YA, Magesa SM, Pedersen EM, Stensgaard AS, et al. (2014) Lymphatic filariasis  
523 control in Tanga Region, Tanzania: status after eight rounds of mass drug administration. *Parasit*  
524 *Vectors* 7: 507.
- 525 29. Gyapong JO, Kumaraswami V, Biswas G, Ottesen EA (2005) Treatment strategies underpinning the  
526 global programme to eliminate lymphatic filariasis. *Expert Opin Pharmacother* 6: 179-200.
- 527 30. Jambulingam P, Subramanian S, de Vlas SJ, Vinubala C, Stolk WA (2016) Mathematical modelling of  
528 lymphatic filariasis elimination programmes in India: required duration of mass drug  
529 administration and post-treatment level of infection indicators. *Parasit Vectors* 9: 501.
- 530 31. Kastner RJ, Stone CM, Steinmann P, Tanner M, Tediosi F (2015) What Is Needed to Eradicate  
531 Lymphatic Filariasis? A Model-Based Assessment on the Impact of Scaling Up Mass Drug  
532 Administration Programs. *PLoS Negl Trop Dis* 9.
- 533 32. Stolk WA, Walker M, Coffeng LE, Basanez MG, de Vlas SJ (2015) Required duration of mass  
534 ivermectin treatment for onchocerciasis elimination in Africa: a comparative modelling analysis.  
535 *Parasit Vectors* 8: 552.
- 536 33. de Souza DK, Yirenyki E, Otchere J, Biritwum NK, Ameme DK, et al. (2016) Assessing Lymphatic  
537 Filariasis Data Quality in Endemic Communities in Ghana, Using the Neglected Tropical Diseases  
538 Data Quality Assessment Tool for Preventive Chemotherapy. *PLoS Negl Trop Dis* 10: e0004590.
- 539 34. Irvine MA, Reimer LJ, Njenga SM, Gunawardena S, Kelly-Hope L, et al. (2015) Modelling strategies to  
540 break transmission of lymphatic filariasis--aggregation, adherence and vector competence  
541 greatly alter elimination. *Parasit Vectors* 8: 547.

- 542 35. Chu BK, Deming M, Biritwum NK, Bougma WR, Dorkenoo AM, et al. (2013) Transmission assessment  
543 surveys (TAS) to define endpoints for lymphatic filariasis mass drug administration: a  
544 multicenter evaluation. PLoS Negl Trop Dis 7: e2584.



546 **Table 1: Assessment of mf prevalence**

| <b>Assessment of mf prevalence</b>                                      | <b>2000</b> | <b>2001</b><br>* | <b>2002</b> | <b>2003</b><br>* | <b>2004</b> | <b>2005</b><br>* | <b>2006</b><br>* | <b>2007</b> | <b>2008</b><br>* | <b>2009</b><br>* | <b>2010</b><br>* | <b>2011</b> | <b>2012</b><br>* | <b>2013</b>  | <b>2014</b>  | <b>2015</b> | <b>2016</b> |
|-------------------------------------------------------------------------|-------------|------------------|-------------|------------------|-------------|------------------|------------------|-------------|------------------|------------------|------------------|-------------|------------------|--------------|--------------|-------------|-------------|
| No. of IUs that started MDA                                             | 1           | 9                | 17          | 27               | 16          | 25               | 3                | 0           | 0                | 0                | 0                | 0           | 0                | 0            | 0            | 0           | 0           |
| No. of IUs that stopped MDA                                             | 0           | 0                | 0           | 0                | 0           | 0                | 0                | 0           | 0                | 0                | 5                | 0           | 0                | 0            | 65           | 9           | 2           |
| No. of communities included in mf prevalence surveys (No. of districts) | 24 (8)      | 0 (0)            | 10 (5)      | 40 (18)          | 25 (12)     | 34 (10)*         | 0 (0)            | 59 (9)      | 0 (0)            | 111 (21)         | 0 (0)            | 109 (31)    | 103 (19)         | 24 (13)      | 74 (16)      | -           | -           |
| No. of people examined for mf                                           | 2,607       | -                | 1,784       | 4,603            | 2,933       | 4,579            | -                | 7,643       | -                | 15,175           | -                | 15,675      | 19,268           | 11,026       | 13,901       | -           | -           |
| Average mf prevalence (%) in examined communities (range)               | 23 (11-46)  | -                | 2.8 (0-12)  | 7.1 (0-28)       | 8.1 (0-34)  | 2.0 (0-4)        | -                | 3.5 (0-21)  | -                | 2.4 (0-18.8)     | -                | 0.23 (0-15) | 0.68 (0-9.8)     | 0.85 (0-3.7) | 0.57 (0-5.6) | -           | -           |
| No. of communities with mf prev >1% (%)                                 | 24 (100)    | -                | 5 (50)      | 25 (62.5)        | 17 (68)     | 6 (60)           | -                | 37 (62.7)   | -                | 44 (39.6)        | -                | 3 (2.8)     | 18 (17.5)        | 6 (25)       | 10 (13.5)    | -           | -           |

547 IU = implementation Unit, MDA = mass drug administration, Com=community, Cov=coverage, prev=prevalence, mf=microfilaraemia, No. = number

548 \*Refer to Data limitations and Special situations above.

549

550 **Supporting Information**

551

552 **S1 Checklist: STROBE Checklist**

553

554 **Table S1: Community-based Mf prevalence at baseline in year 2000 - 2004**

| <b>Region</b> | <b>District</b>    | <b>Community</b>  | <b>Year of sampling</b> | <b>No. examined</b> | <b>No. positive</b> | <b>Mf prevalence % (95%-CI)</b> |
|---------------|--------------------|-------------------|-------------------------|---------------------|---------------------|---------------------------------|
| Brong-Ahafo   | Techiman-Municipal | Kwesi-Gyan        | 2004                    | 138                 | 4                   | 2.9 (0.1 - 5.7)                 |
| Brong-Ahafo   | Techiman-Municipal | Nsokonee          | 2004                    | 151                 | 10                  | 6.6 (2.7 - 10.6)                |
| Brong-Ahafo   | Techiman-Municipal | Tandanafo-1       | 2004                    | 141                 | 1                   | 0.7 (0 - 2.1)                   |
| Brong-Ahafo   | Techiman-Municipal | Tandanafo-2       | 2004                    | 100                 | 0                   | 0.0                             |
| Central       | Agona-East         | Essusu            | 2002                    | 84                  | 10                  | 11.9 (5 - 18.8)                 |
| Central       | Agona-East         | Kwesi-Paintsil    | 2002                    | 52                  | 0                   | 0.0                             |
| Central       | Effutu-Municipal   | Ateitu            | 2000                    | 103                 | 16                  | 15.5 (8.5 - 22.5)               |
| Central       | Effutu-Municipal   | Atekyedo          | 2000                    | 72                  | 9                   | 12.5 (4.9 - 20.1)               |
| Central       | Effutu-Municipal   | Gyahadze          | 2000                    | 92                  | 42                  | 45.7 (35.5 - 55.8)              |
| Central       | Effutu-Municipal   | Gyangyanadze      | 2000                    | 139                 | 33                  | 23.7 (16.7 - 30.8)              |
| Central       | Effutu-Municipal   | Nsuekyir          | 2000                    | 108                 | 19                  | 17.6 (10.4 - 24.8)              |
| Central       | Effutu-Municipal   | Osubonpanyin      | 2000                    | 92                  | 25                  | 27.2 (18.1 - 36.3)              |
| Central       | KEEA               | Ankwanda_Teterem* | 2003                    | 400                 | 3                   | 0.8 (0 - 1.6)                   |
| Eastern       | Ayensuano          | Kofi-Pare         | 2004                    | 277                 | 0                   | 0.0                             |
| Eastern       | Ayensuano          | Kwaboanta         | 2004                    | 100                 | 0                   | 0.0                             |
| Eastern       | Ayensuano          | Onakwase          | 2004                    | 142                 | 5                   | 3.5 (0.5 - 6.6)                 |
| Greater-Accra | Ga-West            | Kofi-Quaye        | 2004                    | 191                 | 0                   | 0.0                             |
| Greater-Accra | Ga-South           | Kudehia           | 2004                    | 188                 | 1                   | 0.5 (0 - 1.6)                   |
| Greater-Accra | Ga-South           | Obom              | 2004                    | 104                 | 0                   | 0.0                             |
| Northern      | East-Gonja         | Kalande_Kpembe*   | 2003                    | 486                 | 0                   | 0.0                             |
| Northern      | East-Mamprusi      | Namaasim          | 2002                    | 273                 | 0                   | 0.0                             |
| Northern      | East-Mamprusi      | Zaadantinga       | 2002                    | 230                 | 1                   | 0.4 (0 - 1.3)                   |
| Northern      | West-Mamprusi      | Wungu             | 2002                    | 441                 | 5                   | 1.1 (0.1 - 2.1)                 |

|            |                 |                     |      |     |    |                    |
|------------|-----------------|---------------------|------|-----|----|--------------------|
| Northern   | Yendi           | Adibo               | 2004 | 200 | 0  | 0.0                |
| Northern   | Yendi           | Bumbung             | 2004 | 184 | 8  | 4.3 (1.4 - 7.3)    |
| Northern   | Yendi           | Kulkpeni            | 2004 | 132 | 9  | 6.8 (2.5 - 11.1)   |
| Upper-East | Bawku-Municipal | 44                  | 2002 | 104 | 6  | 5.8 (1.3 - 10.3)   |
| Upper-East | Bawku-Municipal | Zawsie              | 2002 | 265 | 5  | 1.9 (0.2 - 3.5)    |
| Upper-East | Bawku-Municipal | Ziako               | 2002 | 136 | 10 | 7.4 (3.0 - 11.7)   |
| Upper-East | Builsa-North    | Achangyeri          | 2000 | 102 | 26 | 25.5 (17.0 - 33.9) |
| Upper-East | Builsa-North    | Chuchuliga-Namonsa  | 2000 | 107 | 22 | 20.6 (12.9 - 28.2) |
| Upper-East | Builsa-North    | Kpandema            | 2000 | 121 | 29 | 24.0 (16.4 - 31.6) |
| Upper-East | Builsa-North    | Pilsa               | 2000 | 111 | 26 | 23.4 (15.5 - 31.3) |
| Upper-East | KND-Municipal   | Biu                 | 2000 | 110 | 31 | 28.2 (19.8 - 36.6) |
| Upper-East | KND-Municipal   | Korania             | 2000 | 121 | 43 | 35.5 (27.0 - 44.1) |
| Upper-East | KND-Municipal   | Namolo              | 2000 | 126 | 41 | 32.5 (24.4 - 40.7) |
| Upper-East | KND-West        | Baduna              | 2000 | 112 | 24 | 21.4 (13.8 - 29.0) |
| Upper-West | Daffiama-BI     | Touri               | 2000 | 108 | 17 | 15.7 (8.9 - 22.6)  |
| Upper-West | Sissala-East    | Banu                | 2000 | 113 | 35 | 31.0 (22.4 - 39.5) |
| Upper-West | Sissala-West    | Bouti               | 2000 | 109 | 12 | 11.0 (5.1 - 16.9)  |
| Upper-West | Sissala-West    | Sorbelle            | 2000 | 99  | 26 | 26.3 (17.6 - 34.9) |
| Western    | Ahanta-West     | Asemasa             | 2000 | 98  | 17 | 17.3 (9.9 - 24.8)  |
| Western    | Ahanta-West     | Asemko              | 2000 | 112 | 14 | 12.5 (6.4 - 18.6)  |
| Western    | Ahanta-West     | Busua               | 2000 | 124 | 29 | 23.4 (15.9 - 30.8) |
| Western    | Ahanta-West     | Butre               | 2000 | 123 | 35 | 28.5 (20.5 - 36.4) |
| Western    | Ahanta-West     | Cape-3-points       | 2000 | 99  | 17 | 17.2 (9.7 - 24.6)  |
| Western    | Ahanta-West     | Mpataano            | 2000 | 106 | 19 | 17.9 (10.6 - 25.2) |
| Western    | Ellembelle      | Anwia               | 2002 | 100 | 0  | 0.0                |
| Western    | Ellembelle      | Bomoakpoley         | 2002 | 99  | 0  | 0.0                |
| Western    | Shama           | Shama_Shama-Kumasi* | 2003 | 557 | 3  | 0.5 (0 - 1.1)      |

555 \*Mf prevalence data were combined from two communities in the same district. Districts names in the table represent the current districts after the re-demarcations.  
556 Mf = microfilaria, CI = confidence interval  
557

558 **Table S2. Overview of MDA implementation and progress towards elimination by district in Ghana, for the 98 districts that**  
559 **were identified as endemic.**

| District                     | District number | Region        | District population (2010) | Mf data available - Time post 1st treatment (year) | Baseline mf prevalence (range) | MDA start year* | TAS-1 (Year of last treatment) | Total no. of treatment rounds received by 2016 | TAS-2 (year) | TAS-3 (year) | Hotspot (2016) MDA on-going |
|------------------------------|-----------------|---------------|----------------------------|----------------------------------------------------|--------------------------------|-----------------|--------------------------------|------------------------------------------------|--------------|--------------|-----------------------------|
| Abura Asebu Kwamankese (AAK) | 28              | Central       | 117,185                    | 8                                                  | -                              | 2003            | 2014                           | 11                                             | 2016         | Not yet      | -                           |
| Accra Metro                  | 96              | Greater Accra | 1,848,614                  | 7                                                  | -                              | 2006            | 2014                           | 8                                              | 2016         | Not yet      | -                           |
| Agona East                   | 11              | Central       | 85,920                     | 0,1                                                | 6 (0 - 11.9)                   | 2002            | 2010                           | 9                                              | 2012         | 2015         | -                           |
| Agona West Municipal         | 12              | Central       | 115,358                    | -                                                  | -                              | 2002            | 2010                           | 9                                              | 2012         | 2015         | -                           |
| Ahanta West                  | 1               | Western       | 106,215                    | 0,3,7,12,14                                        | -                              | 2000            | Not yet                        | 16                                             | Not yet      | Not yet      | Yes                         |
| Ajumaku Enyan Essiam (AEE)   | 29              | Central       | 138,046                    | 8                                                  | -                              | 2003            | 2014                           | 11                                             | 2016         | Not yet      | -                           |
| Akrumfi                      | 30              | Central       | 52,231                     | -                                                  | -                              | 2003            | 2014                           | 11                                             | Not yet      | Not yet      | -                           |
| Akwapim South                | 71              | Eastern       | 123,501                    | 6                                                  | -                              | 2005            | 2014                           | 9                                              | 2016         | Not yet      | -                           |
| Aowin                        | 55              | Western       | 138,415                    | 7                                                  | 19.5 (12.5 - 28.5)             | 2004            | 2014                           | 10                                             | 2016         | Not yet      | -                           |
| Asikuma Odoben Brakwa (AOB)  | 56              | Central       | 112,706                    | 7                                                  | -                              | 2004            | 2014                           | 10                                             | 2016         | Not yet      | -                           |
| Assin North                  | 57              | Central       | 161,341                    | -                                                  | -                              | 2004            | 2014                           | 10                                             | 2016         | Not yet      | -                           |
| Assin South                  | 58              | Central       | 104,244                    | 7                                                  | -                              | 2004            | 2014                           | 10                                             | 2016         | Not yet      | -                           |
| Awutu Senya East Municipal   | 2               | Central       | 108,422                    | -                                                  | -                              | 2001            | 2010                           | 10                                             | 2012         | 2015         | -                           |
| Awutu Senya West             | 3               | Central       | 86,884                     | 6                                                  | -                              | 2001            | 2010                           | 10                                             | 2012         | 2015         | -                           |
| Ayensuano                    | 72              | Eastern       | 77,193                     | 0,6                                                | -                              | 2005            | 2014                           | 9                                              | 2016         | Not yet      | -                           |
| Bawku Municipal              | 31              | Upper East    | 217,791                    | 0,9                                                | 5 (1.9 - 5.8)                  | 2003            | 2014                           | 11                                             | 2016         | Not yet      | -                           |
| Bawku West                   | 32              | Upper East    | 94,034                     | 6,10                                               | -                              | 2003            | 2014                           | 11                                             | Not yet      | Not yet      | -                           |
| Binduri                      | 33              | Upper East    | 61,576                     | -                                                  | -                              | 2003            | 2014                           | 11                                             | 2016         | Not yet      | -                           |

| District             | District number | Region        | District population (2010) | Mf data available - Time post 1st treatment (year) | Baseline mf prevalence (range) | MDA start year* | TAS-1 (Year of last treatment) | Total no. of treatment rounds received by 2016 | TAS-2 (year) | TAS-3 (year) | Hotspot (2016) MDA on-going |
|----------------------|-----------------|---------------|----------------------------|----------------------------------------------------|--------------------------------|-----------------|--------------------------------|------------------------------------------------|--------------|--------------|-----------------------------|
| Bole                 | 68              | Northern      | 61,593                     | 7,10                                               | -                              | 2004            | Not yet                        | 12                                             | Not yet      | Not yet      | Yes                         |
| Bolgatanga Municipal | 15              | Upper East    | 131,550                    | 1,2,7,11                                           | -                              | 2002            | 2015                           | 13                                             | Not yet      | Not yet      | -                           |
| Bongo                | 16              | Upper East    | 84,545                     | 1,2,7,11                                           | -                              | 2002            | 2015                           | 13                                             | Not yet      | Not yet      | -                           |
| Builsa North         | 7               | Upper East    | 56,477                     | 0,2,6,11                                           | 23.4 (20.6 - 25.5)             | 2001            | 2015                           | 14                                             | Not yet      | Not yet      | -                           |
| Builsa South         | 8               | Upper East    | 36,514                     | 6,12                                               | -                              | 2001            | 2015                           | 14                                             | Not yet      | Not yet      | -                           |
| Bunkprugu Yunyoo     | 73              | Northern      | 122,591                    | 7                                                  | -                              | 2005            | 2014                           | 9                                              | 2016         | Not yet      | -                           |
| Cape Coast           | 59              | Central       | 169,894                    | 7                                                  | -                              | 2004            | 2014                           | 10                                             | 2016         | Not yet      | -                           |
| Central Gonja        | 74              | Northern      | 87,877                     | 6                                                  | -                              | 2005            | 2014                           | 9                                              | 2016         | Not yet      | -                           |
| Chereponi            | 34              | Northern      | 53,394                     | 8                                                  | -                              | 2003            | 2014                           | 11                                             | 2016         | Not yet      | -                           |
| Daffiama Busie Issa  | 17              | Upper West    | 32,827                     | 0,1,2,7,11                                         | -                              | 2002            | 2015                           | 13                                             | Not yet      | Not yet      | -                           |
| East Gonja           | 60              | Northern      | 135,450                    | 7                                                  | 0                              | 2004            | 2014                           | 10                                             | 2016         | Not yet      | -                           |
| East Mamprusi        | 35              | Northern      | 121,009                    | 0,9                                                | 0.22 (0 - 0.4)                 | 2003            | 2014                           | 11                                             | 2016         | Not yet      | -                           |
| Effutu Municipal     | 4               | Central       | 68,597                     | 0,2,6,13                                           | 23.7 (12.5-45.7)               | 2001            | 2010                           | 10                                             | 2012         | 2015         | -                           |
| Ellembelle           | 20              | Western       | 87,501                     | 0,7,10                                             | -                              | 2002            | Not yet                        | 14                                             | Not yet      | Not yet      | Yes                         |
| Ga Central           | 75              | Greater Accra | 117,220                    | -                                                  | -                              | 2005            | 2014                           | 9                                              | 2016         | Not yet      | -                           |
| Ga East              | 76              | Greater Accra | 259,668                    | 6                                                  | -                              | 2005            | 2014                           | 9                                              | 2016         | Not yet      | -                           |
| Ga South             | 77              | Greater Accra | 485,643                    | 0,6                                                | 0.27 (0 - 0.53)                | 2005            | 2014                           | 9                                              | 2016         | Not yet      | -                           |
| Ga West              | 78              | Greater Accra | 262,742                    | 0,6                                                | 0                              | 2005            | 2014                           | 9                                              | 2016         | Not yet      | -                           |
| Garu Tempene         | 79              | Upper East    | 130,003                    | 7                                                  | -                              | 2005            | 2014                           | 9                                              | 2016         | Not yet      | -                           |

| District              | District number | Region        | District population (2010) | Mf data available - Time post 1st treatment (year) | Baseline mf prevalence (range) | MDA start year* | TAS-1 (Year of last treatment) | Total no. of treatment rounds received by 2016 | TAS-2 (year) | TAS-3 (year) | Hotspot (2016) MDA on-going |
|-----------------------|-----------------|---------------|----------------------------|----------------------------------------------------|--------------------------------|-----------------|--------------------------------|------------------------------------------------|--------------|--------------|-----------------------------|
| Gomoa East            | 13              | Central       | 207,071                    | 9                                                  | -                              | 2002            | 2014                           | 12                                             | 2016         | Not yet      | -                           |
| Gomoa West            | 14              | Central       | 135,189                    | -                                                  | -                              | 2002            | 2014                           | 12                                             | 2016         | Not yet      | -                           |
| Gushiegu              | 36              | Northern      | 111,259                    | -                                                  | -                              | 2003            | 2014                           | 11                                             | 2016         | Not yet      | -                           |
| Jirapa                | 21              | Upper West    | 88,402                     | 1,2,7,11                                           | -                              | 2002            | Not yet                        | 14                                             | Not yet      | Not yet      | Yes                         |
| Jomoro                | 37              | Western       | 150,107                    | 8                                                  | -                              | 2003            | 2014                           | 11                                             | 2016         | Not yet      | -                           |
| Karaga                | 38              | Northern      | 77,706                     | 8                                                  | -                              | 2003            | 2014                           | 11                                             | Not yet      | Not yet      | -                           |
| KEEA                  | 61              | Central       | 144,705                    | 7                                                  | 0.75                           | 2004            | 2014                           | 10                                             | 2016         | Not yet      | -                           |
| KND-Municipal         | 9               | Upper East    | 109,944                    | 0,2,6,11,13                                        | 32.1 (28.1 - 35.5)             | 2001            | 2015                           | 14                                             | Not yet      | Not yet      | -                           |
| KND-West              | 10              | Upper East    | 70,667                     | 0,2,4,6,11,13                                      | 21.4                           | 2001            | Not yet                        | 15                                             | Not yet      | Not yet      | Yes                         |
| Kpandai               | 62              | Northern      | 108,816                    | -                                                  | -                              | 2004            | 2014                           | 10                                             | 2016         | Not yet      | -                           |
| Kumbungu              | 39              | Northern      | 39,341                     | 6                                                  | -                              | 2003            | 2014                           | 11                                             | 2016         | Not yet      | -                           |
| La Dade Kotopon       | 97              | Greater Accra | 183,528                    | 7                                                  | -                              | 2006            | 2014                           | 8                                              | 2016         | Not yet      | -                           |
| La Nkwantanang Madina | 80              | Greater Accra | 111,926                    | -                                                  | -                              | 2005            | 2014                           | 9                                              | 2016         | Not yet      | -                           |
| Lambussie Karni       | 22              | Upper West    | 51,654                     | 1,2,7,12                                           | -                              | 2002            | Not yet                        | 14                                             | Not yet      | Not yet      | Yes                         |
| Lawra                 | 23              | Upper West    | 100,929                    | 1,2,7,11                                           | -                              | 2002            | Not yet                        | 14                                             | Not yet      | Not yet      | Yes                         |
| Ledzokuku krowor      | 98              | Greater Accra | 227,932                    | 7                                                  | -                              | 2006            | 2014                           | 8                                              | 2016         | Not yet      | -                           |
| Mamprugu Moaduri      | 40              | Northern      | 46,894                     | 6                                                  | -                              | 2003            | 2014                           | 11                                             | 2016         | Not yet      | -                           |
| Mfantsiman            | 41              | Central       | 196,563                    | 8                                                  | -                              | 2003            | 2014                           | 11                                             | 2016         | Not yet      | -                           |
| Mion                  | 81              | Northern      | 81,812                     | -                                                  | -                              | 2005            | 2014                           | 9                                              | 2016         | Not yet      | -                           |
| Mpohor                | 42              | Western       | 123,996                    | -                                                  | -                              | 2003            | 2014                           | 11                                             | 2016         | Not yet      | -                           |
| Nabdram               | 92              | Upper East    | 33,826                     | 8                                                  | -                              | 2005            | Not yet                        | 11                                             | Not yet      | Not yet      | Yes                         |

| District               | District number | Region      | District population (2010) | Mf data available - Time post 1st treatment (year) | Baseline mf prevalence (range) | MDA start year* | TAS-1 (Year of last treatment) | Total no. of treatment rounds received by 2016 | TAS-2 (year) | TAS-3 (year) | Hotspot (2016) MDA on-going |
|------------------------|-----------------|-------------|----------------------------|----------------------------------------------------|--------------------------------|-----------------|--------------------------------|------------------------------------------------|--------------|--------------|-----------------------------|
| Nadowli                | 18              | Upper West  | 94,388                     | 7,11                                               | 15.7                           | 2002            | 2015                           | 13                                             | Not yet      | Not yet      | -                           |
| Nandom                 | 24              | Upper West  | 46,040                     | -                                                  | -                              | 2002            | Not yet                        | 14                                             | Not yet      | Not yet      | Yes                         |
| Nanumba North          | 43              | Northern    | 141,584                    | 6                                                  | -                              | 2003            | 2014                           | 11                                             | 2016         | Not yet      | -                           |
| Nanumba South          | 44              | Northern    | 93,464                     | -                                                  | -                              | 2003            | 2014                           | 11                                             | 2016         | Not yet      | -                           |
| North Gonja            | 69              | Northern    | 43,547                     | 10                                                 | -                              | 2004            | Not yet                        | 12                                             | Not yet      | Not yet      | Yes                         |
| Nsawam Adoagyiri       | 82              | Eastern     | 86,000                     | -                                                  | -                              | 2005            | 2014                           | 9                                              | 2016         | Not yet      | -                           |
| Nzema East             | 25              | Western     | 60,828                     | 7,10,12                                            | 0                              | 2002            | Not yet                        | 14                                             | Not yet      | Not yet      | Yes                         |
| Prestea Huni Valley    | 45              | Western     | 159,304                    | -                                                  | -                              | 2003            | 2014                           | 11                                             | 2016         | Not yet      | -                           |
| Pusiga                 | 46              | Upper East  | 57,677                     | -                                                  | -                              | 2003            | 2014                           | 11                                             | 2016         | Not yet      | -                           |
| Saboba                 | 47              | Northern    | 65,706                     | 8                                                  | -                              | 2003            | 2014                           | 11                                             | 2016         | Not yet      | -                           |
| Sagnerigu              | 83              | Northern    | 148,099                    | -                                                  | -                              | 2005            | 2014                           | 9                                              | 2016         | Not yet      | -                           |
| Savelugu Nanton        | 48              | Northern    | 139,283                    | 6                                                  | -                              | 2003            | 2014                           | 11                                             | 2016         | Not yet      | -                           |
| Sawla Tuna Kalba       | 93              | Northern    | 99,863                     | 6,9                                                | -                              | 2005            | Not yet                        | 11                                             | Not yet      | Not yet      | Yes                         |
| Sekondi Takoradi metro | 63              | Western     | 559,548                    | 8                                                  | -                              | 2004            | 2014                           | 10                                             | 2016         | Not yet      | -                           |
| Shama                  | 64              | Western     | 81,966                     | 7                                                  | -                              | 2004            | 2014                           | 10                                             | 2016         | Not yet      | -                           |
| Sissala East           | 5               | Upper West  | 56,528                     | 0,6,11                                             | 0.54                           | 2001            | 2014                           | 13                                             | 2016         | Not yet      | -                           |
| Sissala West           | 6               | Upper West  | 49,573                     | 0,2,6,11                                           | 31                             | 2001            | 2014                           | 13                                             | 2016         | Not yet      | -                           |
| Suaman                 | 65              | Western     | 20,529                     | -                                                  | 18.6 (11 - 26)                 | 2004            | 2014                           | 10                                             | 2016         | Not yet      | -                           |
| Suhum                  | 84              | Eastern     | 167,551                    | 6                                                  | -                              | 2005            | 2014                           | 9                                              | 2016         | Not yet      | -                           |
| Sunyani Municipal      | 94              | Brong Ahafo | 123,224                    | 7,9                                                | 1.2 (0 - 3.5)                  | 2005            | Not yet                        | 11                                             | Not yet      | Not yet      | Yes                         |
| Sunyani West           | 95              | Brong Ahafo | 85,272                     | 7,9                                                | -                              | 2005            | Not yet                        | 11                                             | Not yet      | Not yet      | Yes                         |

| District                   | District number | Region      | District population (2010) | Mf data available - Time post 1st treatment (year) | Baseline mf prevalence (range) | MDA start year* | TAS-1 (Year of last treatment) | Total no. of treatment rounds received by 2016 | TAS-2 (year) | TAS-3 (year) | Hotspot (2016) MDA on-going |
|----------------------------|-----------------|-------------|----------------------------|----------------------------------------------------|--------------------------------|-----------------|--------------------------------|------------------------------------------------|--------------|--------------|-----------------------------|
| Talensi                    | 89              | Upper East  | 115,020                    | 8                                                  | -                              | 2005            | 2015                           | 10                                             | Not yet      | Not yet      | -                           |
| Tamale Metro               | 85              | Northern    | 371,351                    | 6                                                  | -                              | 2005            | 2014                           | 9                                              | 2016         | Not yet      | -                           |
| Tarkwa Nsuaem              | 49              | Western     | 90,477                     | 5                                                  | -                              | 2003            | 2014                           | 11                                             | 2016         | Not yet      | -                           |
| Tatale Sanguli             | 50              | Northern    | 60,039                     | 6                                                  | -                              | 2003            | 2014                           | 11                                             | 2016         | Not yet      | -                           |
| Techiman Municipal         | 90              | Brong Ahafo | 206,856                    | 0,7,9                                              | -                              | 2005            | 2016                           | 11                                             | Not yet      | Not yet      | -                           |
| Techiman North             | 91              | Brong Ahafo | 59,068                     | 9                                                  | 2.6 (0 - 6.6)                  | 2005            | 2016                           | 11                                             | Not yet      | Not yet      | -                           |
| Tolon                      | 51              | Northern    | 112,331                    | 6                                                  | -                              | 2003            | 2014                           | 11                                             | 2016         | Not yet      | -                           |
| Twifo Ati Mokwa            | 66              | Central     | 61,743                     | -                                                  | -                              | 2004            | 2014                           | 10                                             | 2016         | Not yet      | -                           |
| Twifo Heman Lower Denkyira | 67              | Central     | 116,874                    | 7                                                  | -                              | 2004            | 2014                           | 10                                             | 2016         | Not yet      | -                           |
| Upper West Akim            | 86              | Eastern     | 87,051                     | 6                                                  | -                              | 2005            | 2014                           | 9                                              | 2016         | Not yet      | -                           |
| Wa East                    | 26              | Upper West  | 72,074                     | 11                                                 | -                              | 2002            | Not yet                        | 14                                             | Not yet      | Not yet      | Yes                         |
| Wa Municipal               | 19              | Upper West  | 107,214                    | 11                                                 | -                              | 2002            | 2015                           | 13                                             | Not yet      | Not yet      | -                           |
| Wa West                    | 27              | Upper West  | 81,348                     | 1,2,7,11                                           | -                              | 2002            | Not yet                        | 14                                             | Not yet      | Not yet      | Yes                         |
| Wassa East                 | 52              | Western     | 81,073                     | 8                                                  | -                              | 2003            | 2014                           | 11                                             | 2016         | Not yet      | -                           |
| West Akim Municipal        | 87              | Eastern     | 195,349                    | 6                                                  | -                              | 2005            | 2014                           | 9                                              | 2016         | Not yet      | -                           |
| West Gonja                 | 70              | Northern    | 84,727                     | 7,10                                               | -                              | 2004            | Not yet                        | 12                                             | Not yet      | Not yet      | Yes                         |
| West Mamprusi              | 53              | Northern    | 168,011                    | 0,6                                                | 1.1                            | 2003            | 2014                           | 11                                             | 2016         | Not yet      | -                           |
| Yendi                      | 88              | Northern    | 199,592                    | 0,6                                                | 3.7 (0 - 6.8)                  | 2005            | 2014                           | 9                                              | 2016         | Not yet      | -                           |
| Zabzugu                    | 54              | Northern    | 123,854                    | 6                                                  | -                              | 2003            | 2014                           | 11                                             | 2016         | Not yet      | -                           |

560 \* All communities in each district were expected to be treated in the same year MDA started, so the geographical coverage at district level is 100% right from the  
561 start. So far, all TAS surveys were passed (no failures). The year in which TAS surveys were done, were the same year of last MDA. Districts names in the table  
562 represent the current districts after the re-demarcations. Need to explain all abbreviations here



### Trends in lymphatic filariasis mf prevalence within endemic districts in Ghana

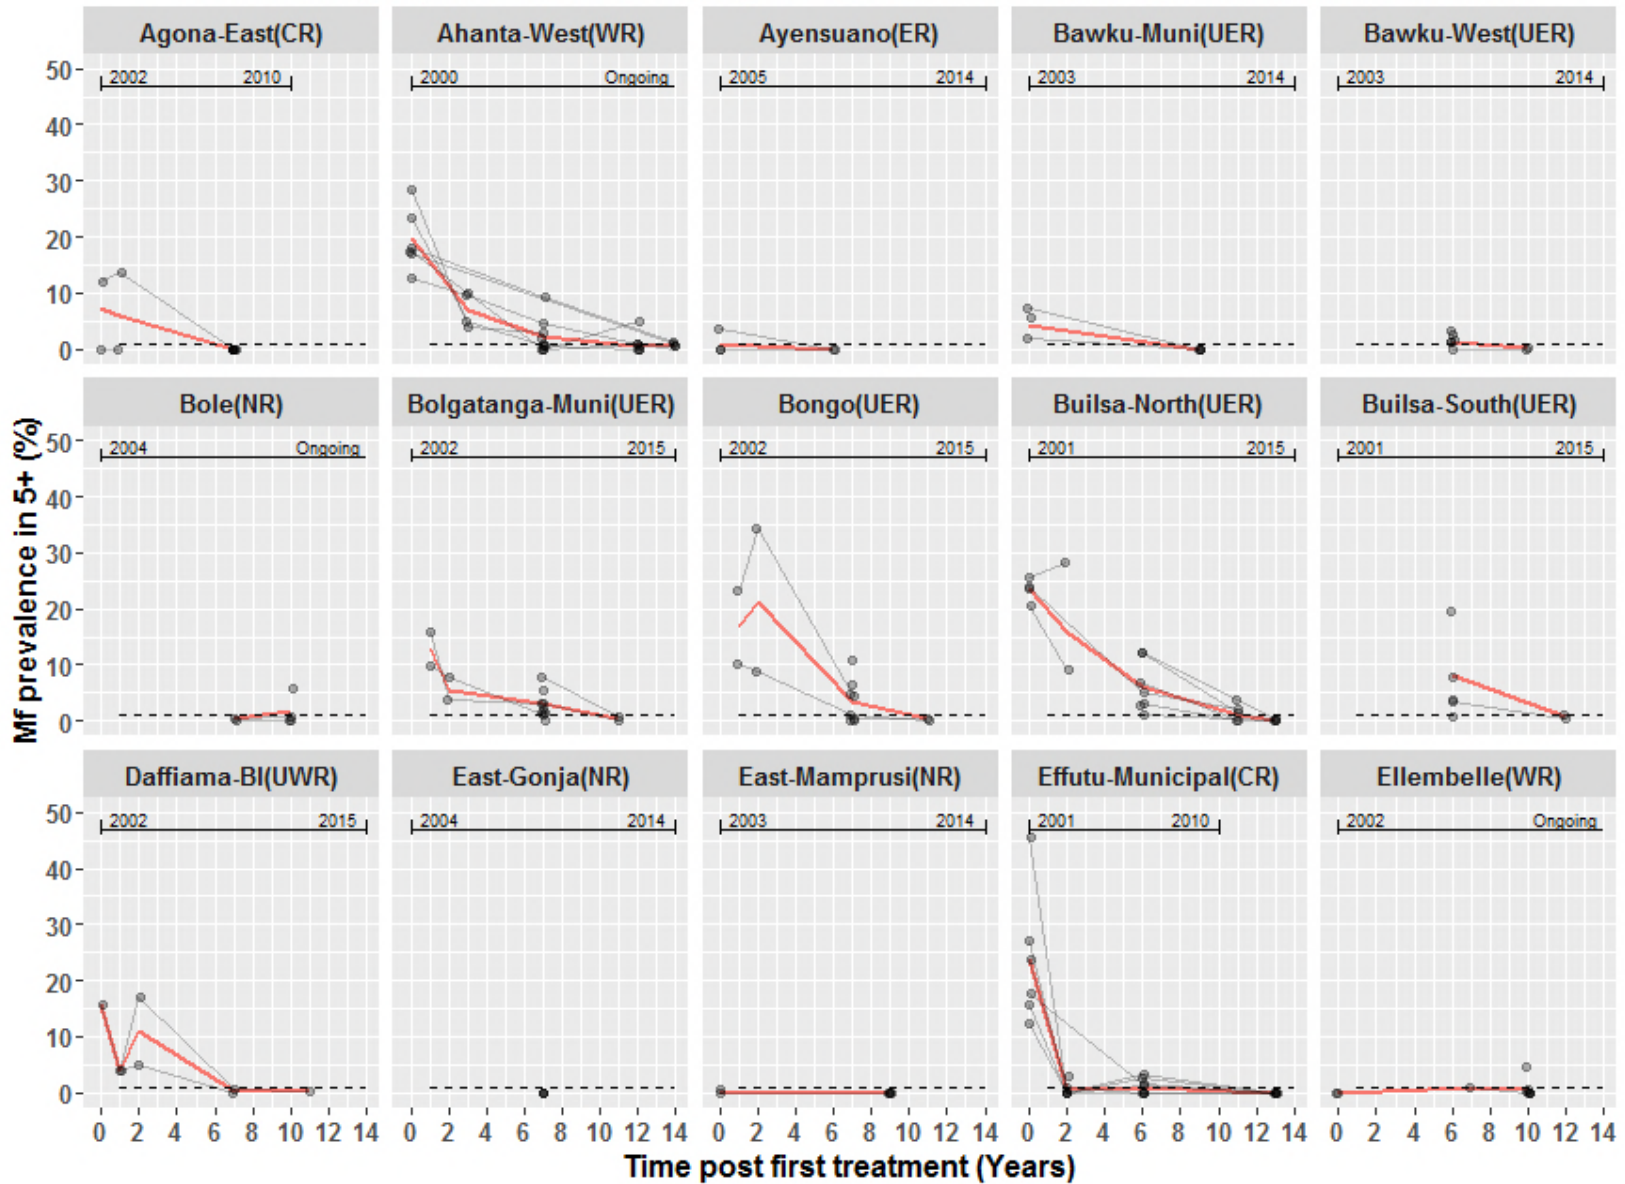

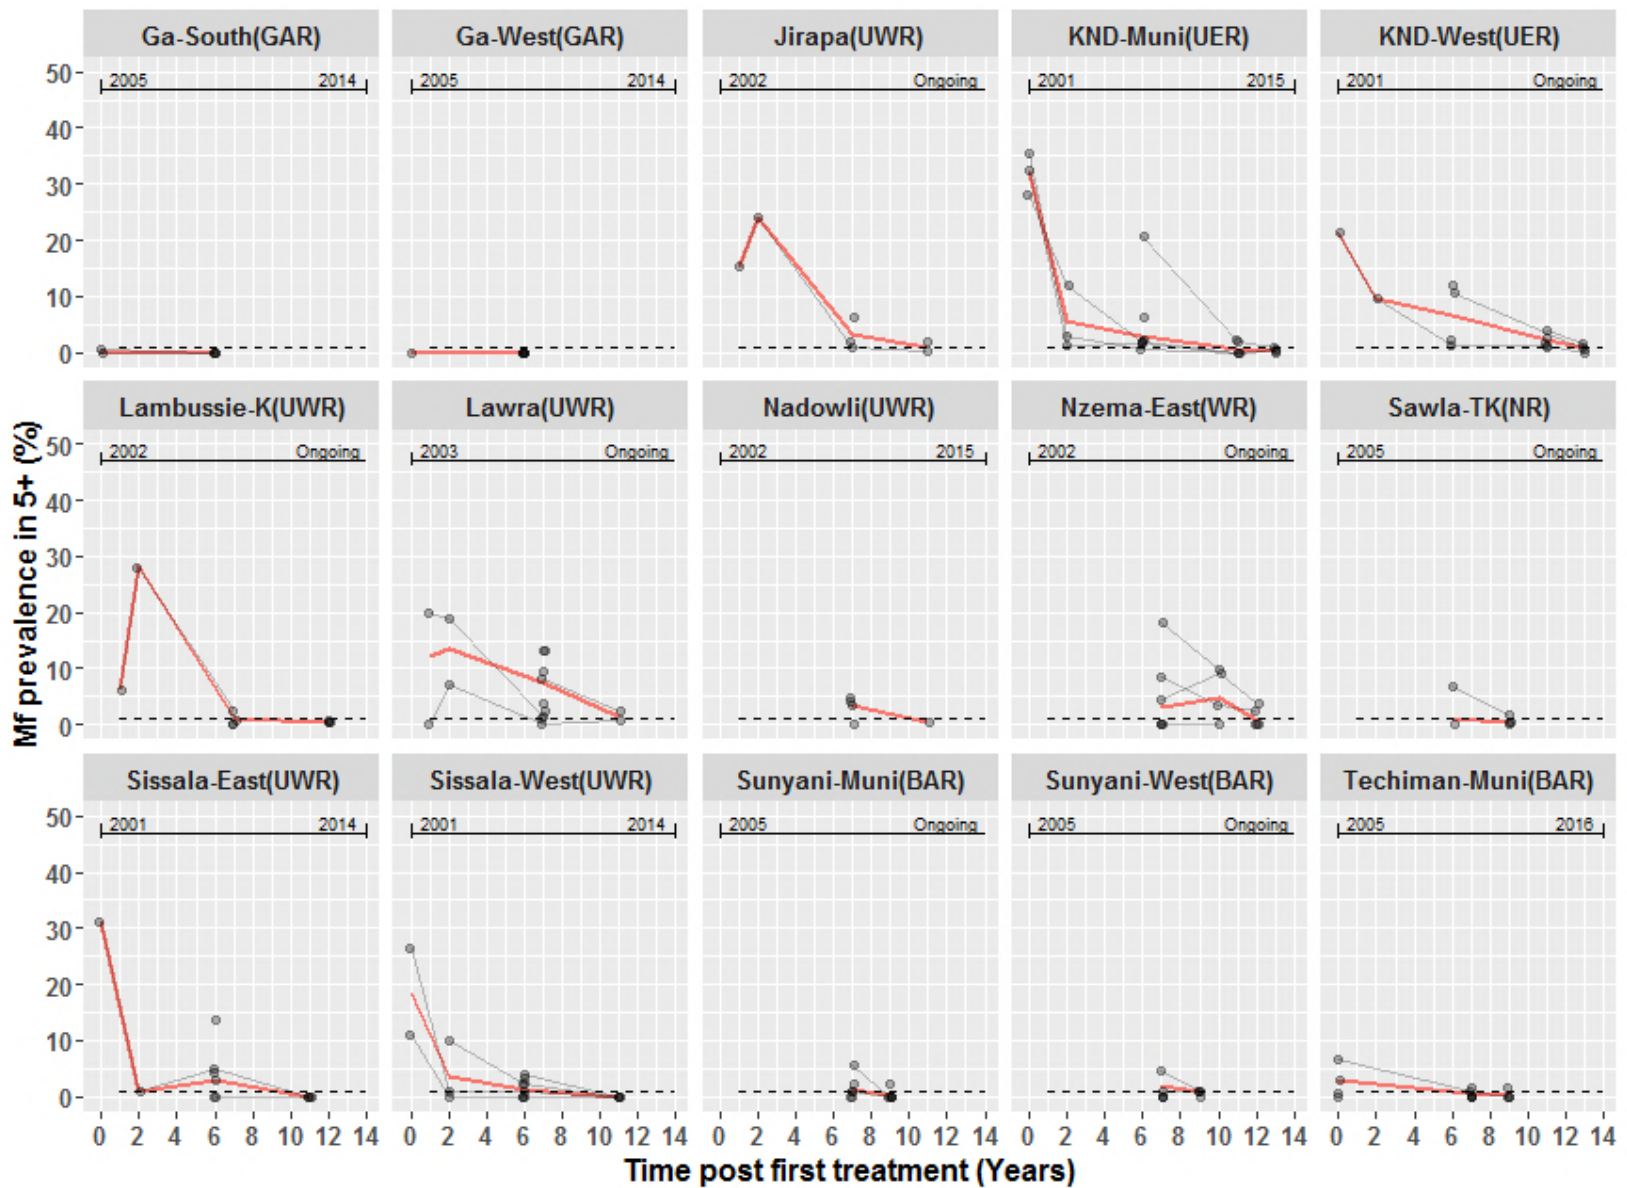

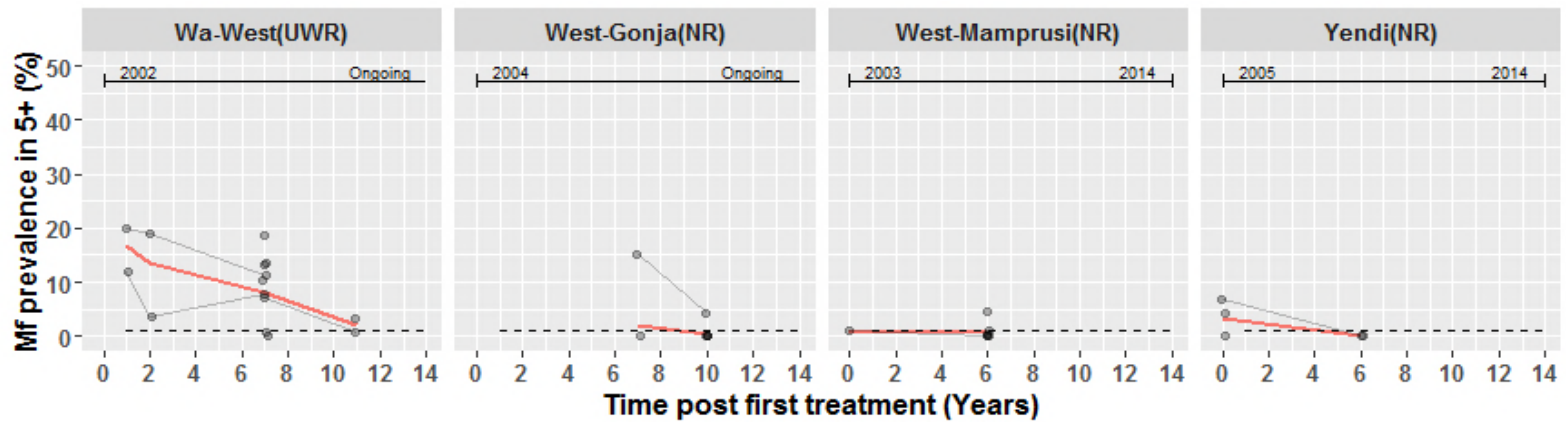

565

566 **Figure S1: Mf prevalence distribution overtime in 34/98 districts with data for multiple time points**

567 Each panel represents a district which was sampled multiple times during the survey. The red continuous line represent the average prevalence in the district at each time point  
 568 estimated from communities sampled within the same district. The bullets are community mf prevalence at each time point and multiple observations from the same community  
 569 are connected through thin grey lines. The dashed horizontal lines represent the threshold mf prevalence of 1%. The line at the upper part of each panel with the text indicate  
 570 the year MDA started and when it ended or if ongoing by September 2016. The suffix attached to district names represent the region in which district is located as follows:  
 571 Brong Ahafo (BAR), Central (CR), Eastern (ER), Greater Accra (GAR), Northern (NR), Upper East (UER), Upper West (UWR) and Western (WR). Districts names in the  
 572 figure represent the current districts after the re-demarcations.

573

574

575

576

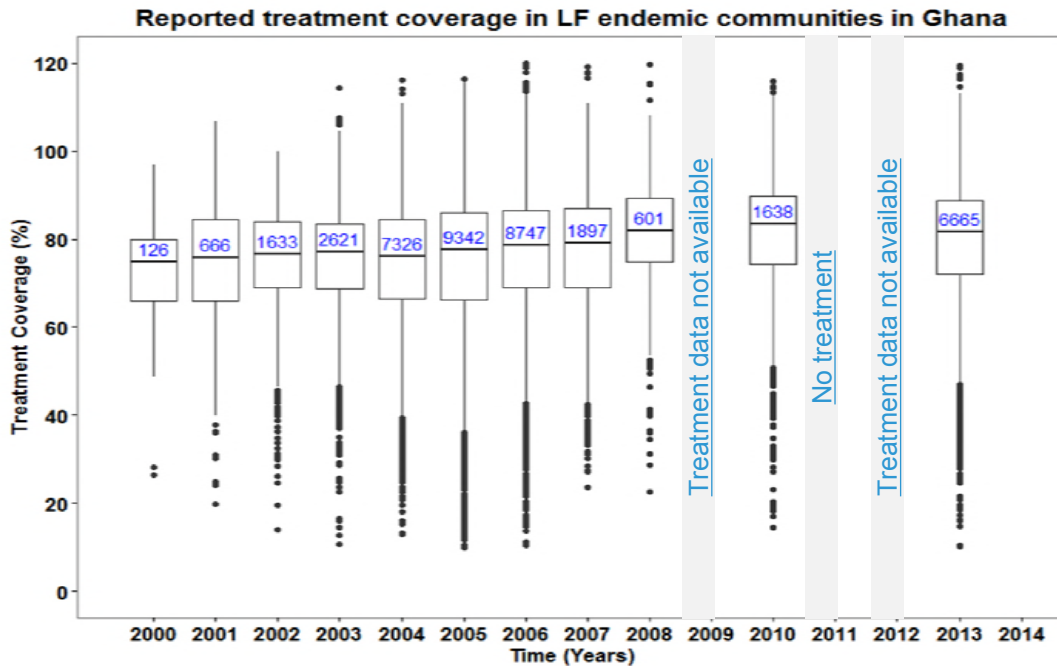

577

578

579

580

581

582

583

584

585

586

587

**Figure S2: Reported treatment coverage in treated communities in Ghana.** The box at each time point represents the interquartile range of coverage and the thick horizontal lines across each box represent the median coverage. The bullets outside each box (above or below) represent the outliers and are calculated as 1.5 times the interquartile range above or below the ends of the box (25<sup>th</sup> and 75<sup>th</sup> percentile). The vertical lines (whiskers) extend to the first value (coverage) before the outlier cut-off and where there are no outliers, they represent the minimum and maximum coverage at each time point. The numbers in the boxes are the total number of communities treated at each time point. There was no treatment offered in 2011 due to some challenges; 2009 and 2012 treatment data not available.

588

589

590

591

592

593

594

595

596

597

598

We acknowledge the fact that these reported coverage may not be very reliable [33] since some areas reported coverage more than 100% (Figure S2). Our data showed a relatively high and constant coverage over time. Some of the flaws may probably be caused by community registers used in estimating the population not being updated, resulting in high coverage and more individuals treated than the existing population in some cases. Treatment coverage may also be overestimated because community directed distributors (CDD) are recommended to treat by direct observed treatment (DOT) but they may not have observed all persons but may record as treated. On the other hand the incidental low coverage could also be due to under-reporting especially where individuals treated by the CDD (who sometimes kept leftover drugs from previous treatments) before or after the GHS treatment period when treatment books were in the possession of the GHS sub-district office.

598

**A**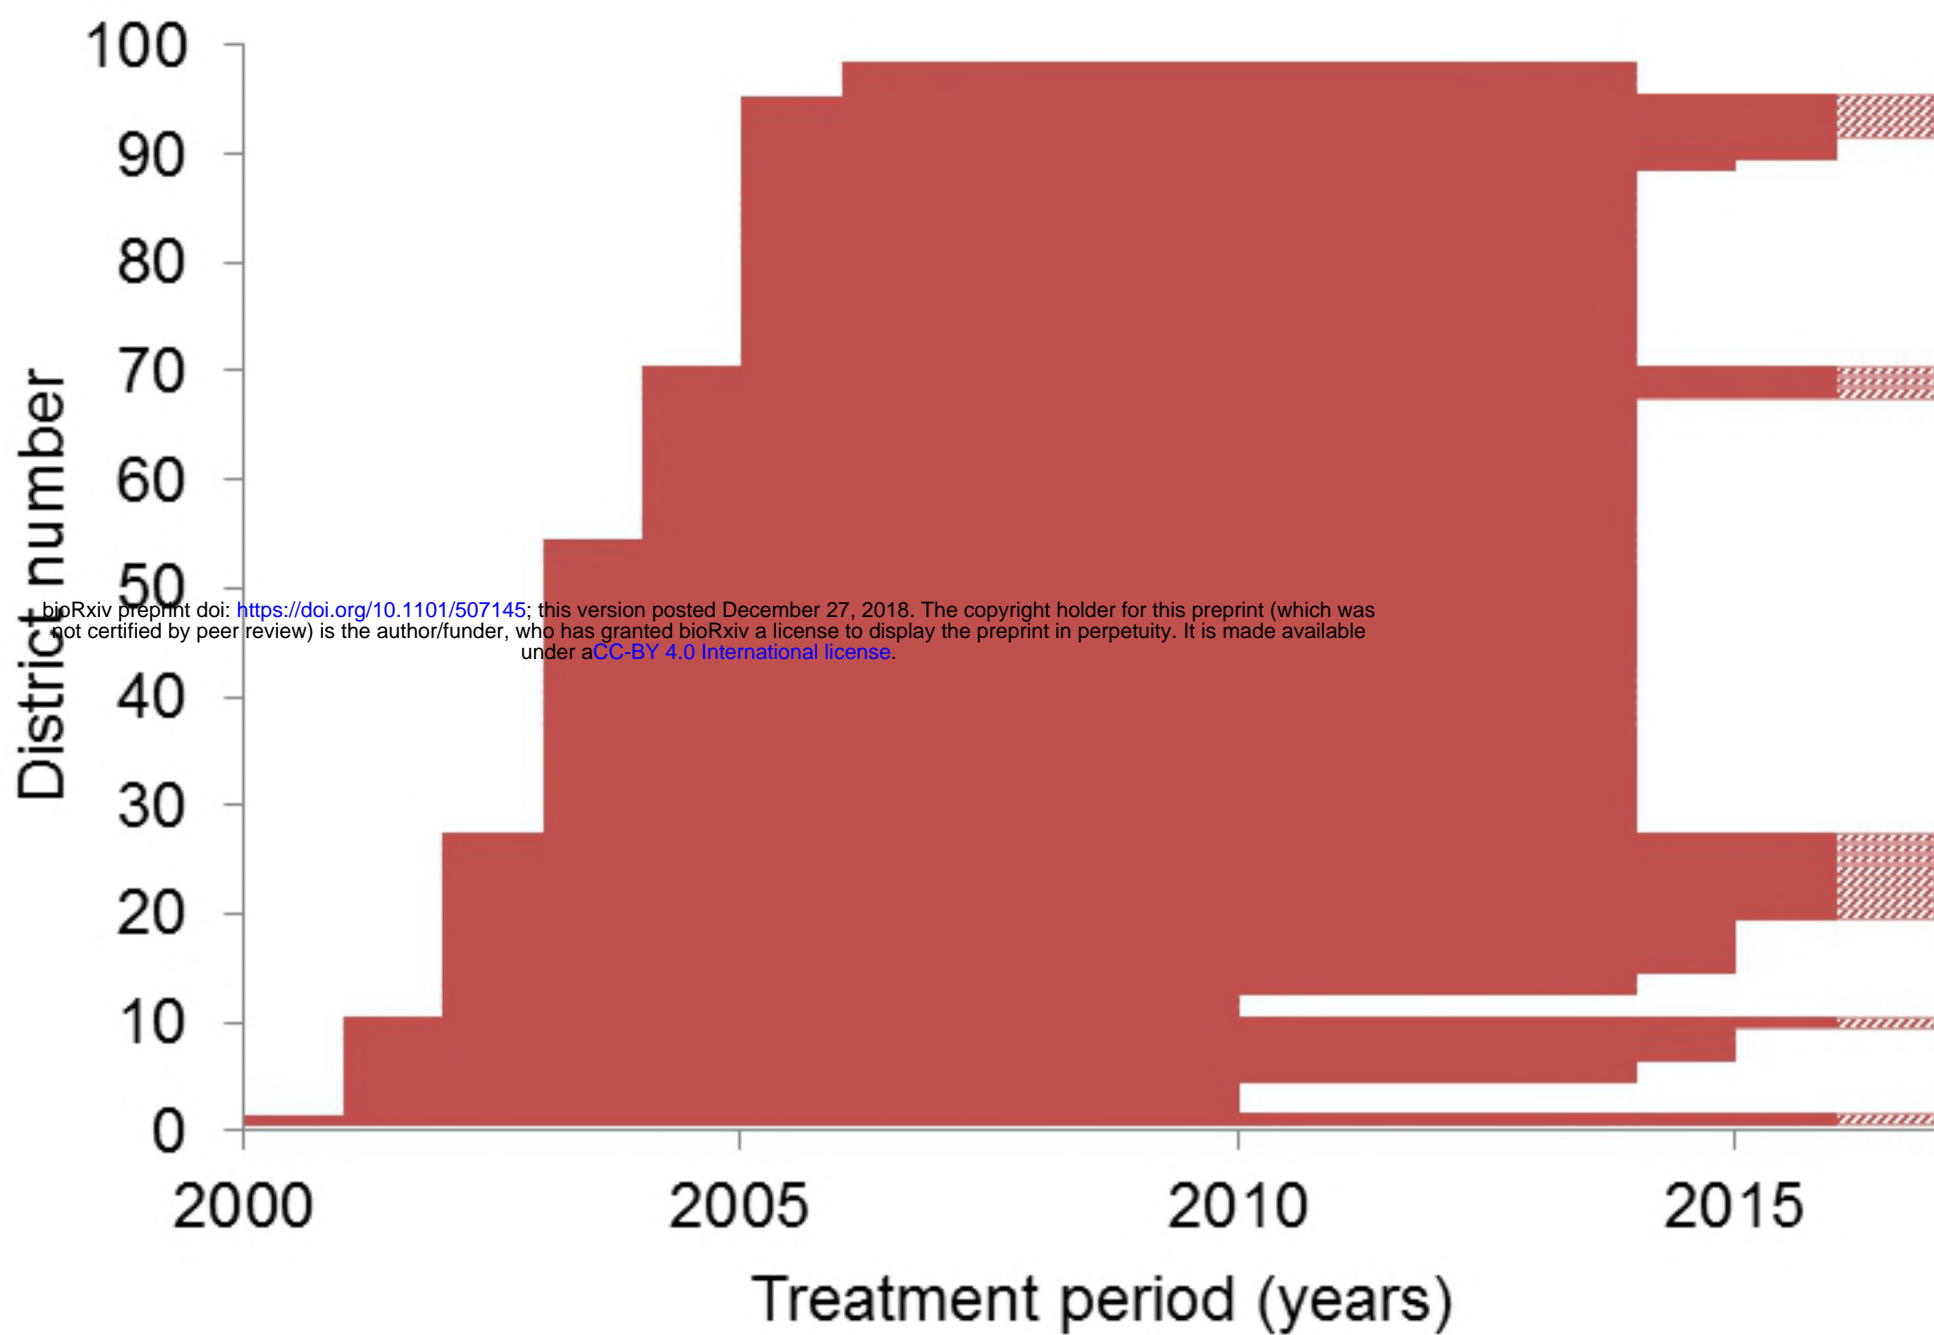**B**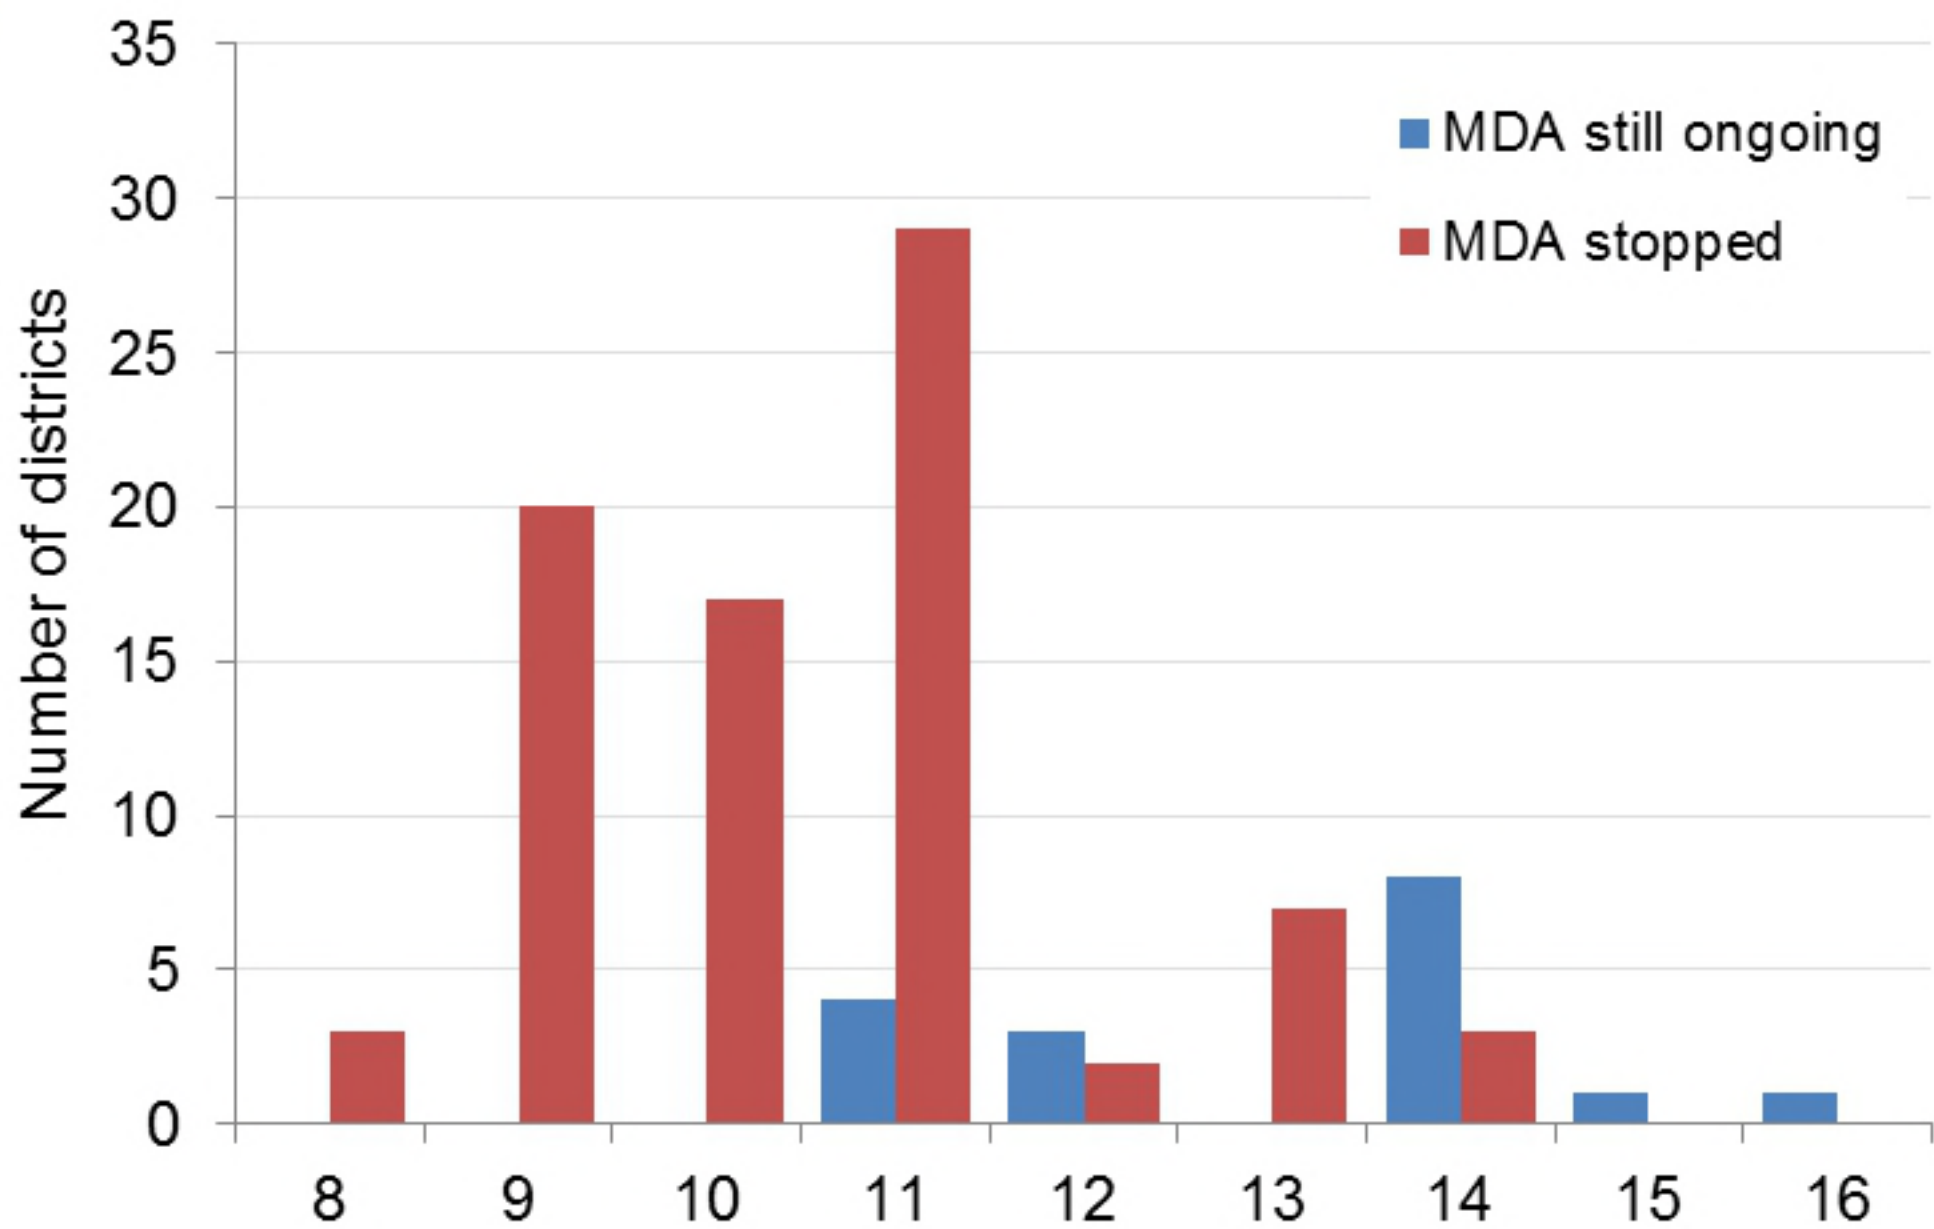



**2000**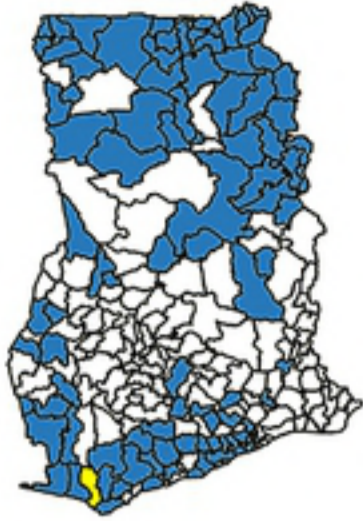**2001**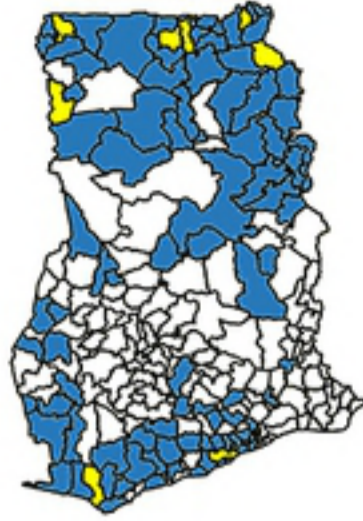**2002**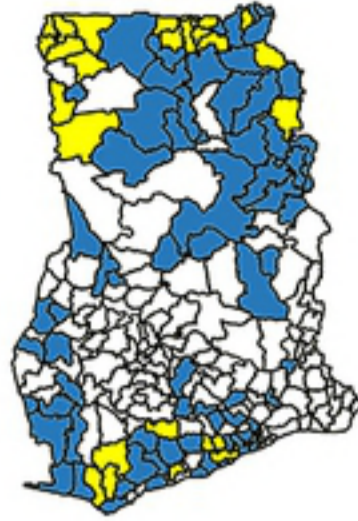**2003**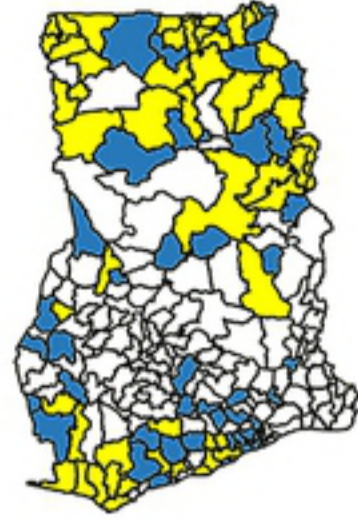**2004**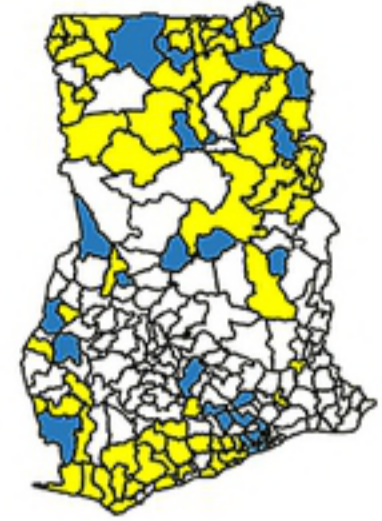

bioRxiv preprint doi: <https://doi.org/10.1101/507145>; this version posted December 27, 2018. The copyright holder for this preprint (which was not certified by peer review) is the author/funder, who has granted bioRxiv a license to display the preprint in perpetuity. It is made available under aCC-BY 4.0 International license.

**2005**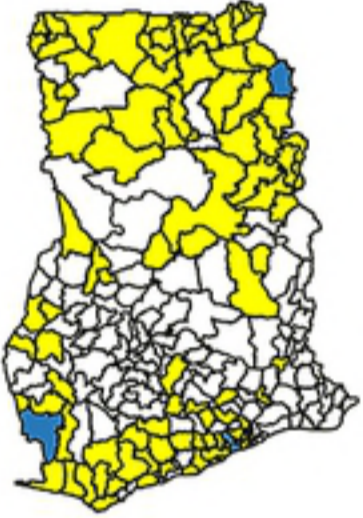**2006**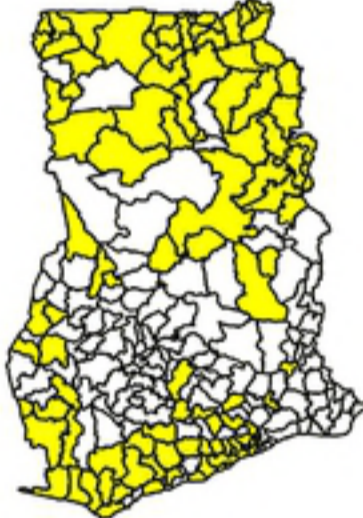**2007**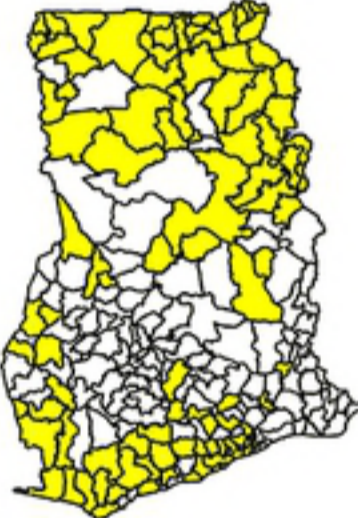**2008**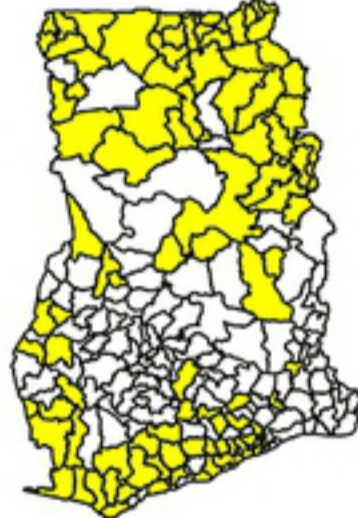**2009**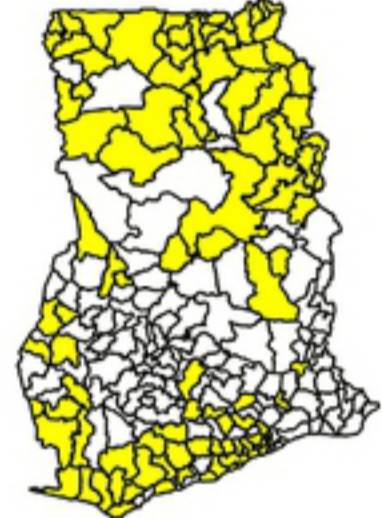**2010**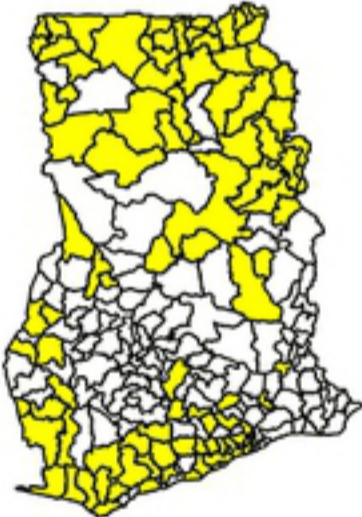**2011**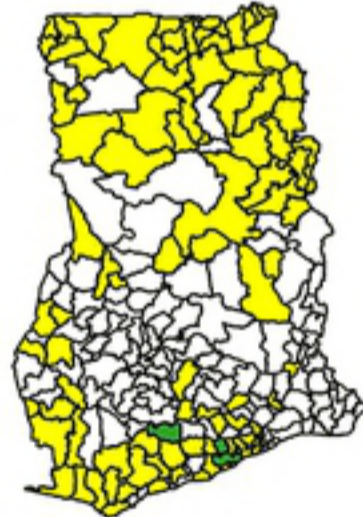**2012**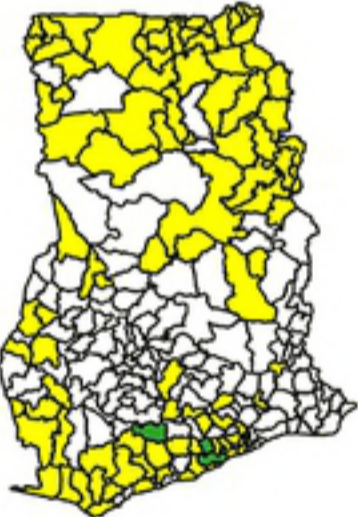**2013**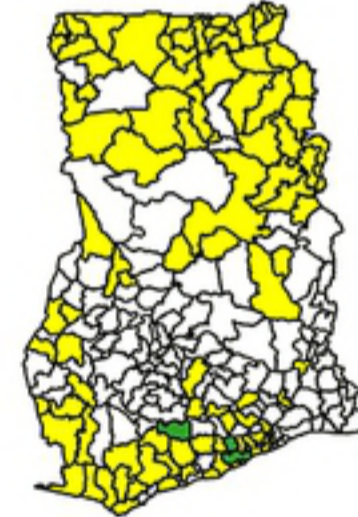**2014**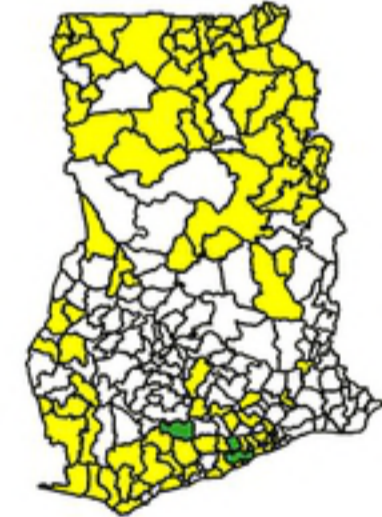

100 0 100 200 300 400 km

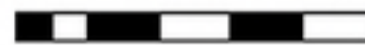**2015**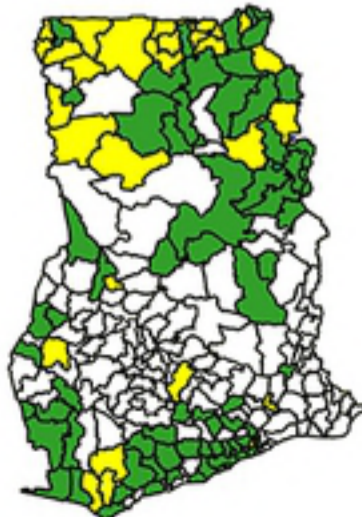**2016**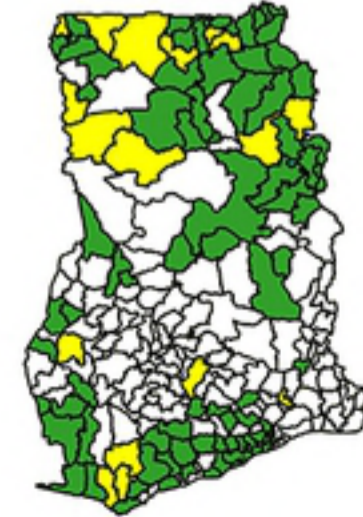

## Legend

### MDA status

Non-endemic

Treatment not started

Treatment on-going

Stopped treatment after passing TAS



### Lymphatic filariasis mf prevalence within communities in Ghana

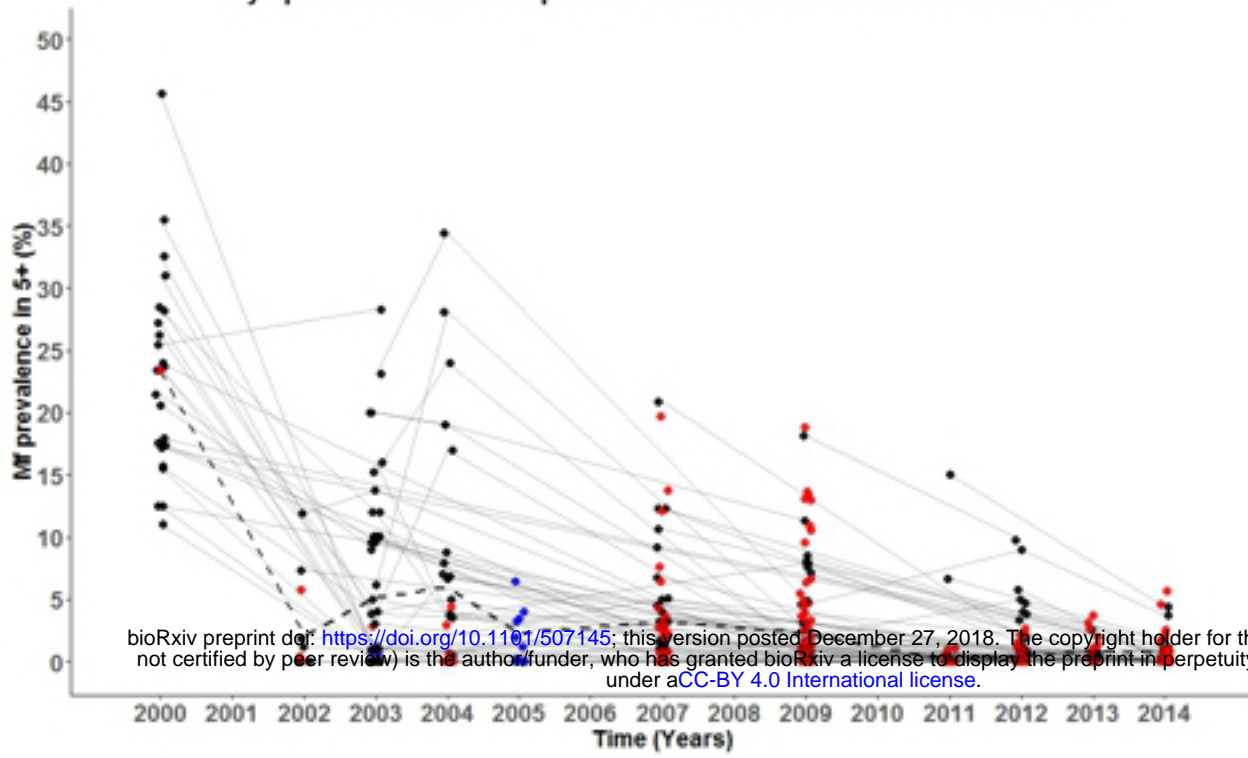

**A**

### Lymphatic filariasis mf prevalence within communities in Ghana

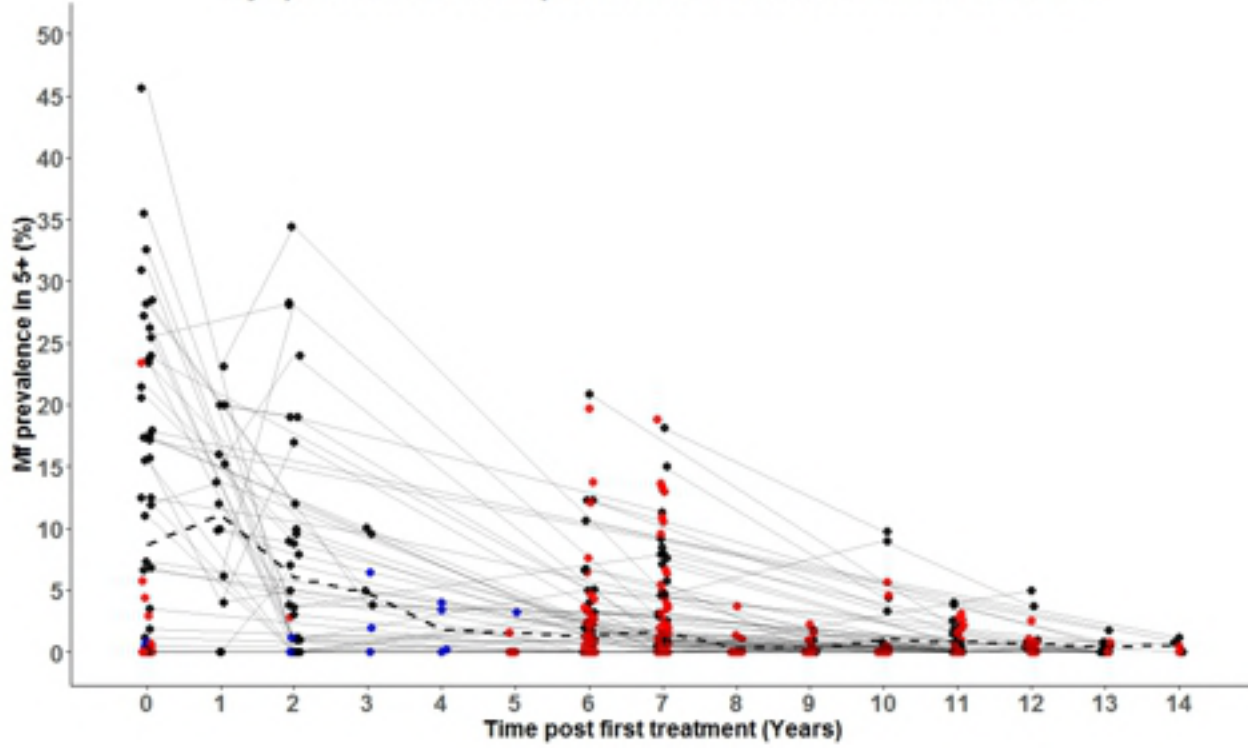

**B**

### Lymphatic filariasis mf prevalence within endemic communities in Ghana

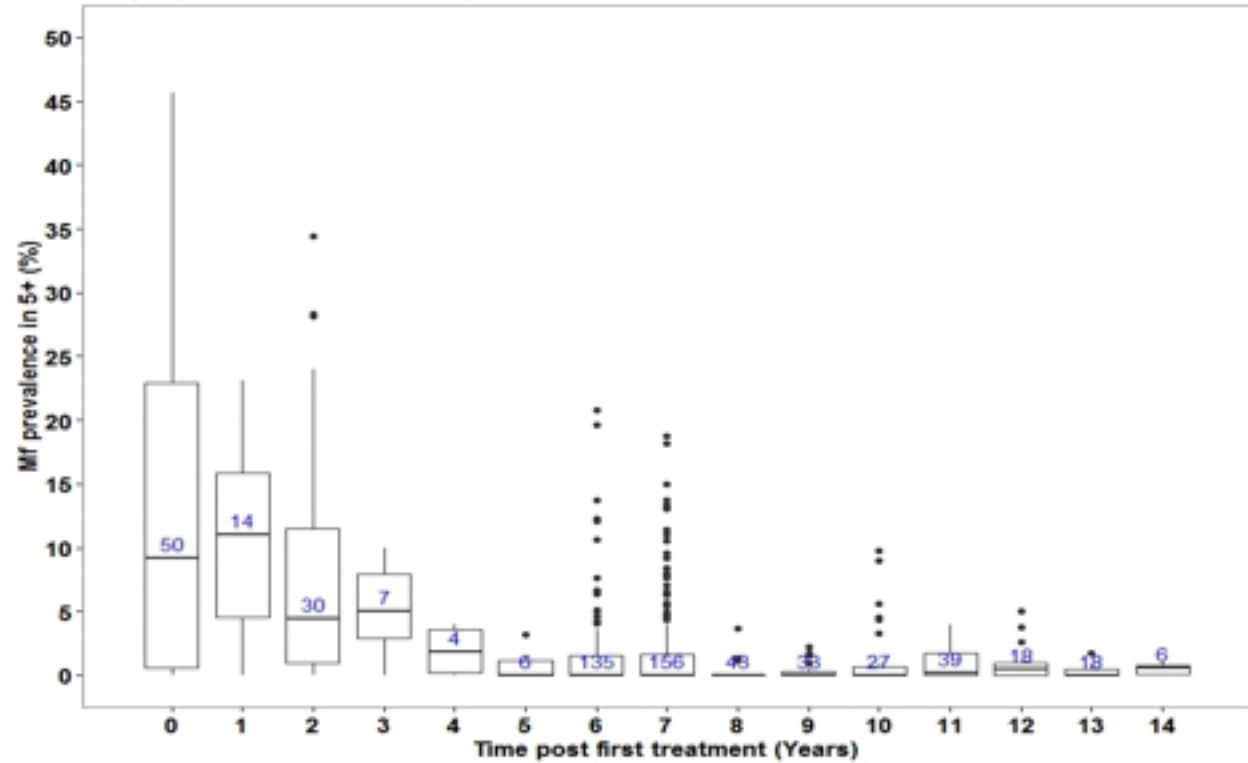

**C**
